# Supplementary material for: Transcription Factor Mavib-1 Negatively Regulates Conidiation by Affecting Utilization of Carbon and Nitrogen Source in Metarhizium acridum
Source: MDPI journal article supplement (doi:10.3390/jof8060594), 2022-06-01
Supplement: s1 [file s1]

A

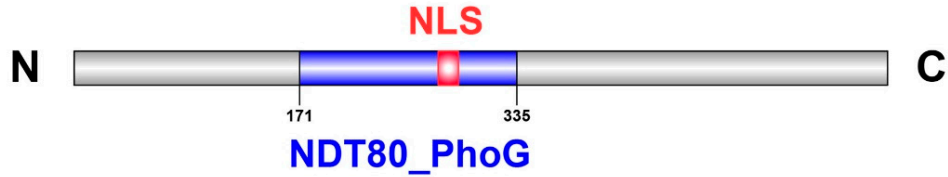

B

|                |                                                                                                                     | NDT80_Phog |  |
|----------------|---------------------------------------------------------------------------------------------------------------------|------------|--|
| XP_007806859.1 | TVNQDHKLLSFRRSQDKSTIVDQGRVQQLELSAQLHGMFFLSEMPASSSDGSVLQPELTCYRRN                                                    | 178        |  |
| KID63767.1     | TVNQDHKLLSFRRSQDKSTIVDQGRVQQLELSAQLHGMFFLSEMPASSSDGSVLQPELTCYRRN                                                    | 167        |  |
| KIE01811.1     | TVNQDHKLLSFRRSQDKSTIVDQGRVQQLELSAQLHGMFFLSEMPASSSDGSVLQPELTCYRRN                                                    | 167        |  |
| RZR61585.1     | TVNQDHKLLSFRRSQDKSTIVDQGRVQQLELSAQLHGMFFLSEMPASSSDGSVLQPELTCYRRN                                                    | 178        |  |
| BA057218.1     | TMNQDHKLLSFRRSQDKSTIVDQGRVQQLELSAQLHGMFFLSEMPASSSDGSVLQPELTCYRRN                                                    | 178        |  |
| KDB16870.1     | TVNQDHKLLSFRRSQDKSTIVDQGRVQQLELSAQLHGMFFLSEMPASSSDGSVLQPELTCYRRN                                                    | 167        |  |
| PNY27208.1     | TVNQDHKLLAFAKRAQDKSTIVDQGRVQQMDLSAQLHGMFFLSEMPASSSDGAAVQPELTCYRRN                                                   | 181        |  |
| KJZ80564.1     | TVNQDHKLLAFAKRAQDKSTIVDQGRVQQLELSAQLHGMFFLSEMPASSSDGAAVQPELTCYRRN                                                   | 119        |  |
| KFG86807.1     | TVNQDHKLLSFRRSQDKSTIVDQGRVQQLELSAQLHGMFFLSEMPASSSDGSVLQPELTCYRRN                                                    | 167        |  |
| TDZ22535.1     | TVNHDHKLSSFRVQDKSTIVDQGRVQQLELSAQLHGMFFLSEMPASSSDGAAVQPELTCYRRN                                                     | 159        |  |
| RKK87621.1     | TASHEHKLSSFRVQDKSTIVDQGRVQQLELSAQLHGMFFLSEMPASSSDGAAVQPELTCYRRN                                                     | 175        |  |
| KGQ10535.1     | TVSQDHKLSSFRRSQDKSTIVDQGRVQQLELSAQLHGMFFLSEMPASSSDGAAVQPELTCYRRN                                                    | 178        |  |
| PMB68120.1     | TVSQDHKLSSFRRSQDKSTIVDQGRVQQLELSAQLHGMFFLSEMPASSSDGAAVQPELTCYRRN                                                    | 169        |  |
| XP_011394571.1 | AMNHDKLLSFRVQDKSTIVDQGRVQQLELSAQLHGMFFLSEMPASSSDGAAVQPELTCYRRN                                                      | 192        |  |
| Consensus      | kll f k t d gr aqlhgmfflse p dg eltcyrrn                                                                            |            |  |
| XP_007806859.1 | LFQISGSLVMPRGQLSVTTESNETLSVSNMEVAVSAIESVDGNPVRLIVIPWKTTPPNPSEISQ                                                    | 243        |  |
| KID63767.1     | LFQISGSLVMPRGQLSVTTESNETLSVSNMEVAVSAIESVDGNPVRLIVIPWKTTPPNPSEISQ                                                    | 232        |  |
| KIE01811.1     | LFQISGSLVMPRGQLSVTTESNETLSVSNMEVAVSAIESVDGNPVRLIVIPWKTTPPNPSEISQ                                                    | 232        |  |
| RZR61585.1     | LFQISGSLVMPRGQLSVTTESNETLSVSNMEVAVSAIESVDGNPVRLIVIPWKTTPPNPSEISQ                                                    | 243        |  |
| BA057218.1     | LFQISGSLVMPRGQLSVTTESNETLSVSNMEVAVSAIESVDGNPVRLIVIPWKTTPPNPSEISQ                                                    | 243        |  |
| KDB16870.1     | LFQISGSLVMPRGQLSVTTESNETLSVSNMEVAVSAIESVDGNPVRLIVIPWKTTPPNPSEISQ                                                    | 232        |  |
| PNY27208.1     | LFQISGSLVMPRGQLSVTTESNETLSVSNMEVAVSAIESVDGNPVRLIVIPWKTTPPNPSEISQ                                                    | 246        |  |
| KJZ80564.1     | LFQISGSLVMPRGQLSVTTESNETLSVSNMEVAVSAIESVDGNPVRLIVIPWKTTPPNPSEISQ                                                    | 184        |  |
| KFG86807.1     | LFQISGSLVMPRGQLSVTTESNETLSVSNMEVAVSAIESVDGNPVRLIVIPWKTTPPNPSEISQ                                                    | 232        |  |
| TDZ22535.1     | LFQISGSLVMPRGQLSVTTESNETLSVSNMEVAVSAIESVDGNPVRLIVIPWKTTPPNPSEISQ                                                    | 224        |  |
| RKK87621.1     | LFQISGSLVMPRGQLSVTTESNETLSVSNMEVAVSAIESVDGNPVRLIVIPWKTTPPNPSEISQ                                                    | 240        |  |
| KGQ10535.1     | LFQISGSLVMPRGQLSVTTESNETLSVSNMEVAVSAIESVDGNPVRLIVIPWKTTPPNPSEISQ                                                    | 243        |  |
| PMB68120.1     | LFQISGSLVMPRGQLSVTTESNETLSVSNMEVAVSAIESVDGNPVRLIVIPWKTTPPNPSEISQ                                                    | 234        |  |
| XP_011394571.1 | LFQISGSLVMPRGQLSVTTESNETLSVSNMEVAVSAIESVDGNPVRLIVIPWKTTPPNPSEISQ                                                    | 257        |  |
| Consensus      | lfq sg p sv e et v saiesvdg pvr livipwktppnp s q                                                                    |            |  |
| XP_007806859.1 | PDQEPSPLPLIPFQEDGNENDGD.FAVYPIGWRRQLQFRIATANNRRKELQQHFVHLKLVHGTLS                                                   | 307        |  |
| KID63767.1     | PDQEPSPLPLIPFQEDGNENDGD.FAVYPIGWRRQLQFRIATANNRRKELQQHFVHLKLVHGTLS                                                   | 296        |  |
| KIE01811.1     | PDQEPSPLPLIPFQEDGNENDGD.FAVYPIGWRRQLQFRIATANNRRKELQQHFVHLKLVHGTLS                                                   | 296        |  |
| RZR61585.1     | PDQEPSPLPLIPFQEDGNENDGD.FAVYPIGWRRQLQFRIATANNRRKELQQHFVHLKLVHGTLS                                                   | 307        |  |
| BA057218.1     | PDQEPSPLPLIPFQEDGNENDGD.FAVYPIGWRRQLQFRIATANNRRKELQQHFVHLKLVHGTLS                                                   | 307        |  |
| KDB16870.1     | PDQEPSPLPLIPFQEDGNENDGD.FAVYPIGWRRQLQFRIATANNRRKELQQHFVHLKLVHGTLS                                                   | 296        |  |
| PNY27208.1     | PDQEPSPLPLIPFQEDGNENDGD.FAVYPIGWRRQLQFRIATANNRRKELQQHFVHLKLVHGTLS                                                   | 310        |  |
| KJZ80564.1     | PDQEPSPLPLIPFQEDGNENDGD.FAVYPIGWRRQLQFRIATANNRRKELQQHFVHLKLVHGTLS                                                   | 248        |  |
| KFG86807.1     | PDQEPSPLPLIPFQEDGNENDGD.FAVYPIGWRRQLQFRIATANNRRKELQQHFVHLKLVHGTLS                                                   | 296        |  |
| TDZ22535.1     | PDQEPSPLPLIPFQEDGNENDGD.FAVYPIGWRRQLQFRIATANNRRKELQQHFVHLKLVHGTLS                                                   | 288        |  |
| RKK87621.1     | PDQEPSPLPLIPFQEDGNENDGD.FAVYPIGWRRQLQFRIATANNRRKELQQHFVHLKLVHGTLS                                                   | 304        |  |
| KGQ10535.1     | PDQEPSPLPLIPFQEDGNENDGD.FAVYPIGWRRQLQFRIATANNRRKELQQHFVHLKLVHGTLS                                                   | 307        |  |
| PMB68120.1     | PDQEPSPLPLIPFQEDGNENDGD.FAVYPIGWRRQLQFRIATANNRRKELQQHFVHLKLVHGTLS                                                   | 298        |  |
| XP_011394571.1 | PDQEPSPLPLIPFQEDGNENDGD.FAVYPIGWRRQLQFRIATANNRRKELQQHFVHLKLVHGTLS                                                   | 322        |  |
| Consensus      | pdqep lplip f q e d g n e n d g d f a v y p i g w r r l q f r i a t a n n g r r k e l q q h f v h l k l v h g t l s |            |  |
| XP_007806859.1 | DNSKVVLSSETITAPIVVRGRSPRNFOARKEIPLLGSSAGSRGOALVETGLGVVASAINLK...QE                                                  | 369        |  |
| KID63767.1     | DNSKVVLSSETITAPIVVRGRSPRNFOARKEIPLLGSSAGSRGOALVETGLGVVASAINLK...QE                                                  | 358        |  |
| KIE01811.1     | DNSKVVLSSETITAPIVVRGRSPRNFOARKEIPLLGSSAGSRGOALVETGLGVVASAINLK...QE                                                  | 358        |  |
| RZR61585.1     | DNSKVVLSSETITAPIVVRGRSPRNFOARKEIPLLGSSAGSRGOALVETGLGVVASAINLK...QE                                                  | 369        |  |
| BA057218.1     | DNSKVVLSSETITAPIVVRGRSPRNFOARKEIPLLGSSAGSRGOALVETGLGVVASAINLK...QE                                                  | 369        |  |
| KDB16870.1     | DNSKVVLSSETITAPIVVRGRSPRNFOARKEIPLLGSSAGSRGOALVETGLGVVASAINLK...QE                                                  | 358        |  |
| PNY27208.1     | DNSKVVLSSETITAPIVVRGRSPRNFOARKEIPLLGSSAGSRGOALVETGLGVVASAINLK...QE                                                  | 372        |  |
| KJZ80564.1     | DNSKVVLSSETITAPIVVRGRSPRNFOARKEIPLLGSSAGSRGOALVETGLGVVASAINLK...QE                                                  | 310        |  |
| KFG86807.1     | DNSKVVLSSETITAPIVVRGRSPRNFOARKEIPLLGSSAGSRGOALVETGLGVVASAINLK...QE                                                  | 358        |  |
| TDZ22535.1     | DNSKVVLSSETITAPIVVRGRSPRNFOARKEIPLLGSSAGSRGOALVETGLGVVASAINLK...QE                                                  | 351        |  |
| RKK87621.1     | DNSKVVLSSETITAPIVVRGRSPRNFOARKEIPLLGSSAGSRGOALVETGLGVVASAINLK...QE                                                  | 367        |  |
| KGQ10535.1     | DNSKVVLSSETITAPIVVRGRSPRNFOARKEIPLLGSSAGSRGOALVETGLGVVASAINLK...QE                                                  | 369        |  |
| PMB68120.1     | DNSKVVLSSETITAPIVVRGRSPRNFOARKEIPLLGSSAGSRGOALVETGLGVVASAINLK...QE                                                  | 360        |  |
| XP_011394571.1 | DNSKVVLSSETITAPIVVRGRSPRNFOARKEIPLLGSSAGSRGOALVETGLGVVASAINLK...QE                                                  | 387        |  |
| Consensus      | k v e t p i v v r g r s p r n f o a r k e i p l l g s s a g s r g o a l v e t g l g v v a s a i n l k . . . q e     |            |  |

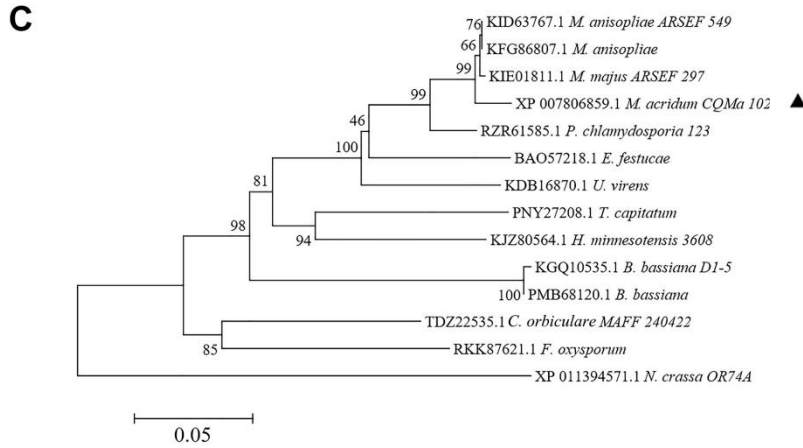

Figure S1 Sequence analysis of Mavib-1

A. Domain analysis of Mavib-1 by BLASTP. B. Sequence alignment of the NDT80\_PhoG domain-containing protein sequences with DNAMAN. C. Phylogenetic analysis of Mavib-1 and its homologous proteins. The protein sequences were aligned with Clustal X and a neighbor joining tree was generated with 1,000 boot strap replicates using the program MEGA v6.0. Numbers at nodes represent the support value of homologs. Branch of Mavib-1 was indicated with black triangle. A phylogenetic tree was generated using MEGA v6.0 software using the neighbor joining method after the protein sequences were aligned by Clustal X, and it passed 1,000 boot strap tests. The phylogenetic tree based on vib-1 sequences from *M. acridum* (MT954969), *M. anisopliae* ARSEF 549 (KID63767.1), *M. anisopliae* (KFG86807.1), *M. majus* ARSEF 297 (KIE01811.1), *P. chlamydosporia* 123 (RZR61585.1), *E. festucae* (GenBank: BAO57218.1), *U. virens* (KDB16870.1), *T. capitatum* (PNY27208.1), *H. mimesotensis* 3608 (KJZ80564.1), *B. bassiana* D1-5 (KGQ10535.1), *B. bassiana* (PMB68120.1), *C. orbiculare* MAFF 240422 (TDZ2253.1), *F. oxysporum* (RKK87621.1), and *Neurospora crassa* OR74A (XP\_011394571.1).

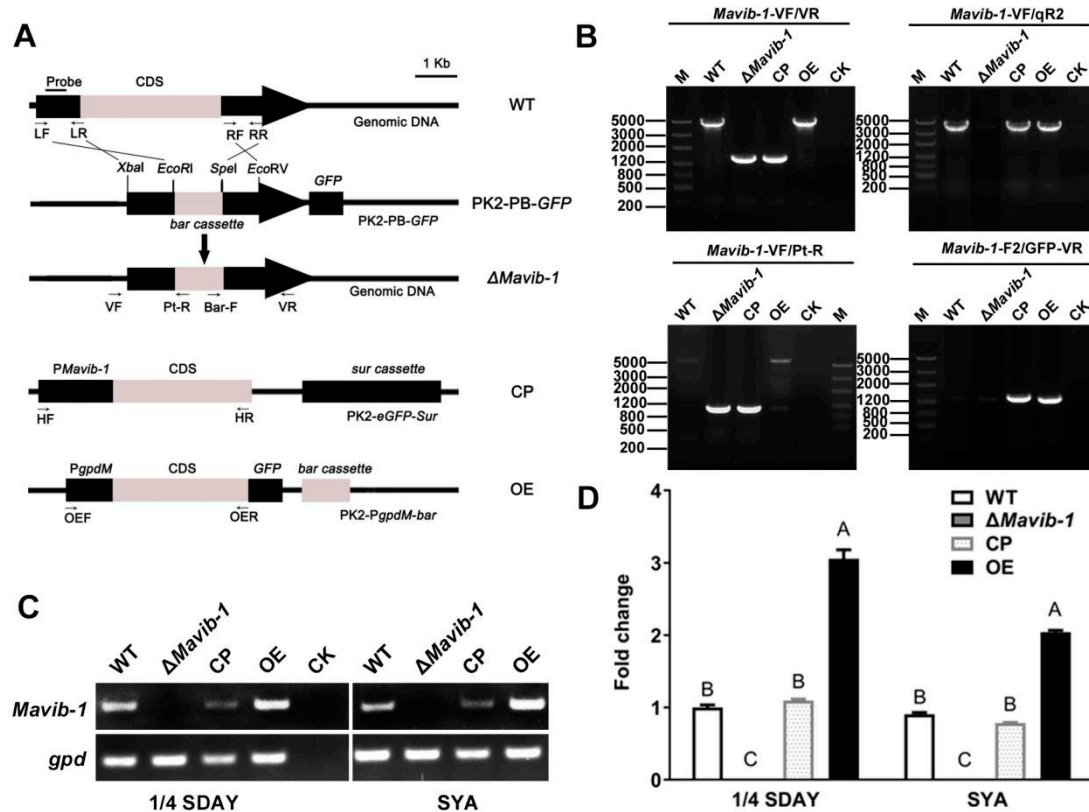

Figure S2 Construction of *Mavib-1* disruption ( $\Delta Mavib-1$ ), complementation (CP) and overexpression (OE) strains of the *Mavib-1* gene in *M. acridum*

A. Sketch map of the *Mavib-1* disruption, complementation and overexpression strains construction. Disruption vector pK2-pb-GFP-*Mavib-1*-LR with *bar* as a screening marker was transformed into WT. *PMavib-1-Mavib-1-sur* was transformed into  $\Delta Mavib-1$  to constructed CP strain and *PgpdM-Mavib-1-EGFP-bar* was transformed into WT to constructed OE strain. B. Verification of each genetic engineering strain by PCR amplification. Primer pairs *Mavib-1*-VF/*Mavib-1*-VR, *Mavib-1*-VF/*Mavib-1*-qR2, *Mavib-1*-VF/Pt-R and *Mavib-1*-F2/GFP-VR were used to screen transformants by PCR. C. RT-PCR analysis of *Mavib-1* in engineering fungal strains. D. RT-qPCR analysis of *Mavib-1* in engineering fungal strains, and the *gpd* gene as a reference.

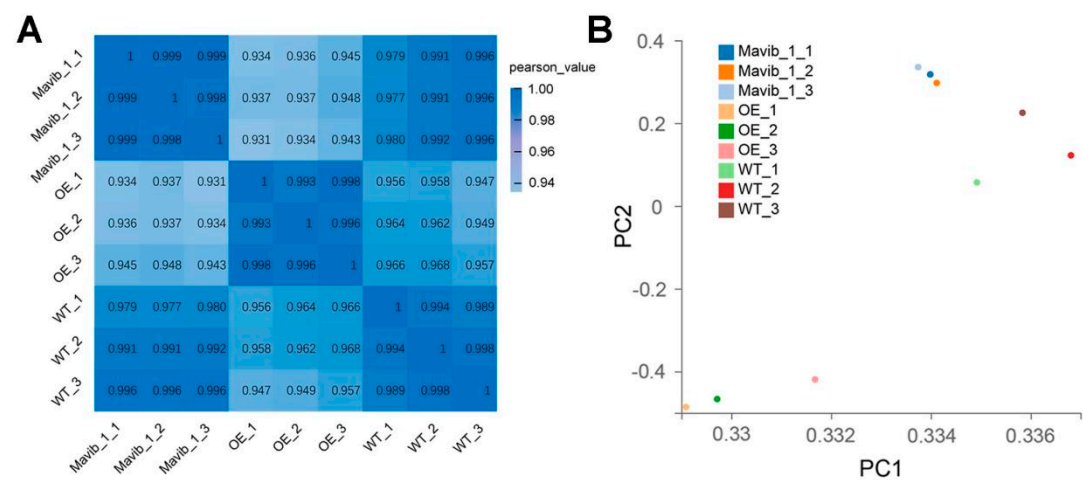

Figure S3 RNA-seq data quality control analysis

A. Correlation heat map. B. Principal component analysis (PCA chart).

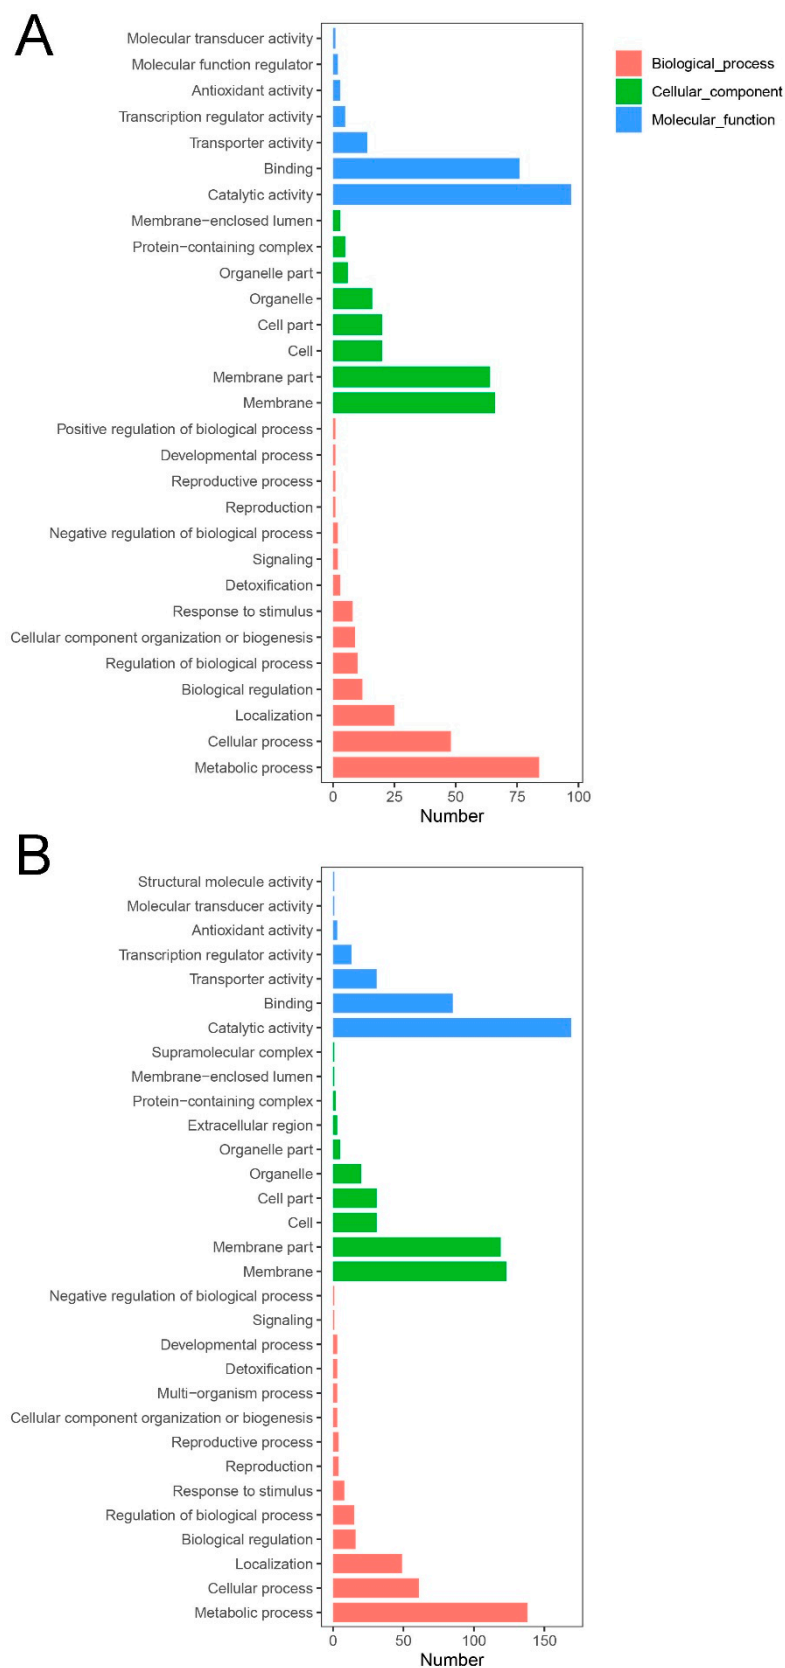

Figure S4 GO classification of DEGs

A. GO classification of DEGs in  $\Delta Mavib-1$ . B. GO classification of DEGs in OE.



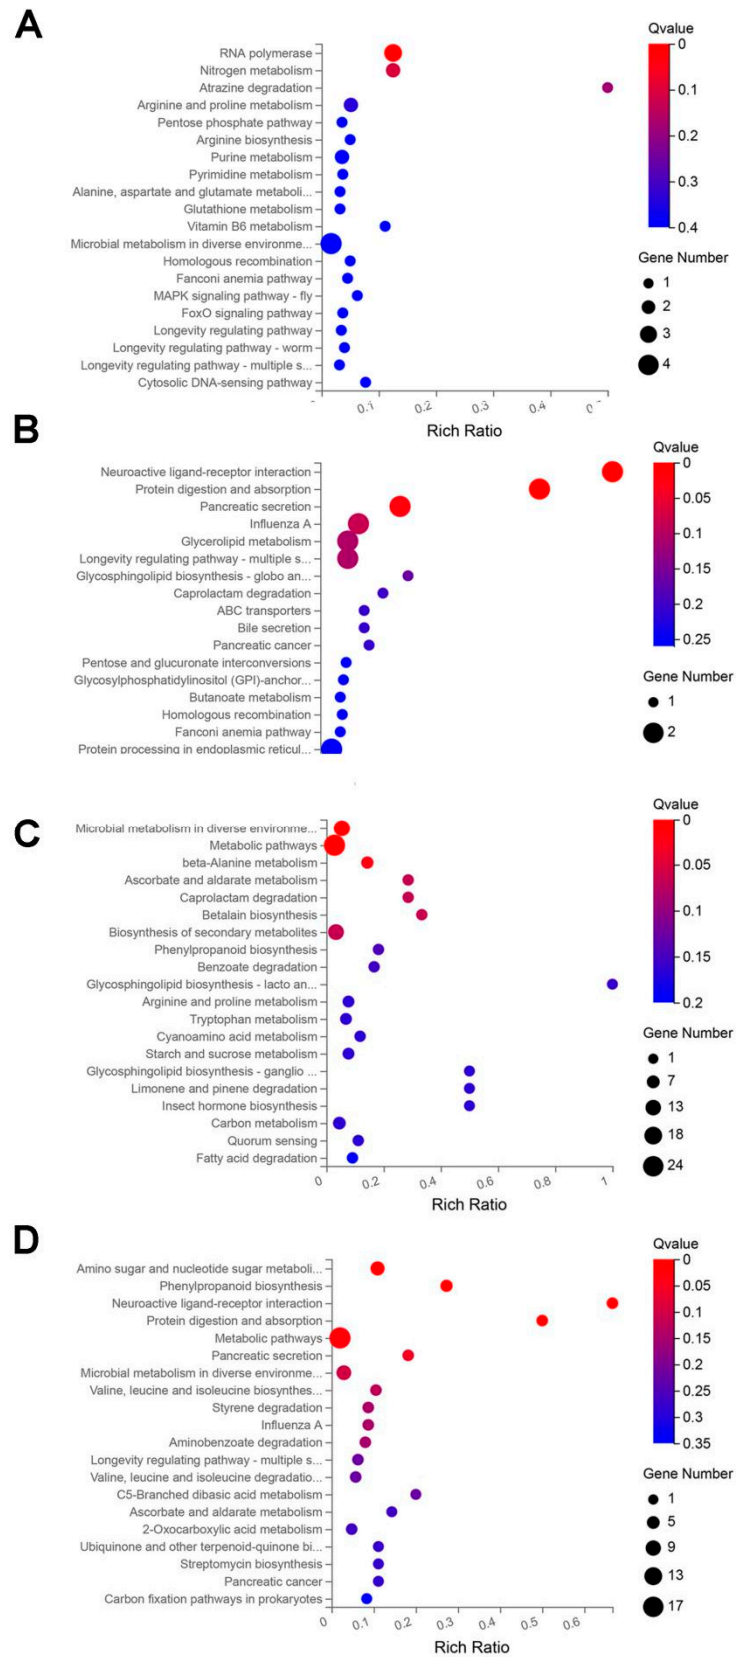

Figure S5 DEGs KEGG pathway enrichment analysis

A. Up-regulated genes in  $\Delta Mavib-1$ ; B. Down-regulated genes in  $\Delta Mavib-1$ ; C. Up-regulated

genes in OE; D. Down-regulated genes in OE. The X-axis is the enrichment ratio, the Y-axis is KEGG Pathway. The bubble size represents the number of genes annotated to a KEGG Pathway, and the color indicates the enriched Q-value. The darker color, the smaller Q-value.

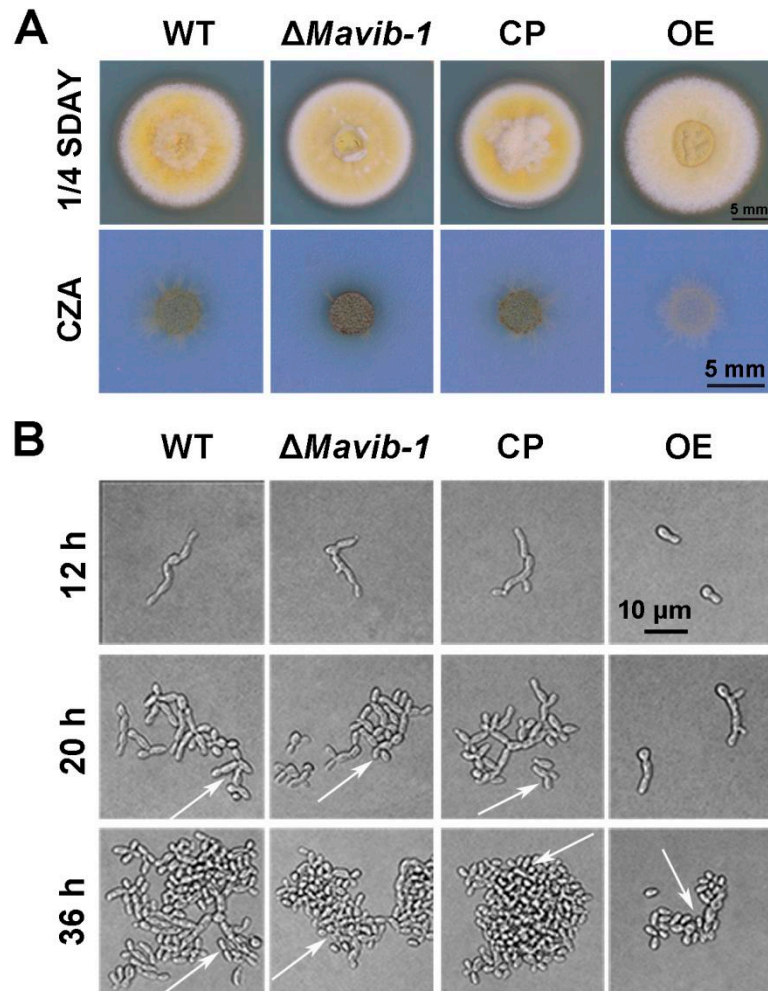

Figure S6 Colony growth and conidiation of fungal strains on minimal medium (CZA)

A. Colony morphology of  $\Delta Mavib-1$ , CP, and OE strains. Fungal strains were cultured on the media 1/4 SDAY and CZA for 6 d. B. Conidiation of  $\Delta Mavib-1$ , CP and OE strains on CZA medium. The white arrow indicates microcycle conidiation.

Table S1 Primers used in construction of *Mavib-1* deletion mutant, complemented and overexpression strains.

| Primer name            | Sequence (5'-3')                                | Note                    |
|------------------------|-------------------------------------------------|-------------------------|
| For cDNA amplification |                                                 |                         |
| <i>Mavib-1</i> -cF1    | TGAACTAATATTTGCCTCCCACGGG                       | First PCR run           |
| <i>Mavib-1</i> -cR1    | GCCTACCGTTGTTTCAGAGCATCTTG                      |                         |
| <i>Mavib-1</i> -cF2    | ATGTCCCCATCCCACGGTAGCTCTT                       | Second PCR run          |
| <i>Mavib-1</i> -cR2    | AGCAGCTGTCCACGAGTAGTTGTTC                       |                         |
| For mutant strains     |                                                 |                         |
| <i>Mavib-1</i> -LF     | GACTAGTGCAGAGGAGGAGAATAGCC                      | Cloning 5' homology arm |
| <i>Mavib-1</i> -LR     | CGGAATTCAATACCACCAGGAGAAAGAA<br>GT              |                         |
| <i>Mavib-1</i> -RF     | GCTCTAGACAGGCGAGACCCACTACTT                     | Cloning 3' homology arm |
| <i>Mavib-1</i> -RR     | ACGATATCCCCTCATCTTCACGACCAC                     |                         |
| <i>Mavib-1</i> -VF     | GCGATGCTTGCTCAACAG                              | Verification            |
| <i>Mavib-1</i> -VR     | CGTACTGAAGAGGCGGAAGT                            | <i>Mavib-1</i> -VF      |
| Pt-R                   | CAGCCAAGCCCCAAAAAGTG                            | Verification            |
| Bar-F                  | GCTCTACACCCACCTGCT                              | Verification            |
| For CP strains         |                                                 |                         |
| <i>Mavib-1</i> -HF     | GACGGCCAGTGCCAAGCTGATGCTCGGTT<br>CTACTCACAA     | Cloning <i>Mavib-1</i>  |
| <i>Mavib-1</i> -HR     | CCTTGCTCACCATGGATCCCTACTACTAAG<br>CAGCTGTCCACGA |                         |
| Sur-VF                 | TCTGAGGCTTGATGAGACCAC                           | Verification            |
| Sur-VR                 | TGTTACAGAGCACCTCGAACTAA                         | Verification            |
| For OE strains         |                                                 |                         |



| Primer name                               | Sequence (5'-3')                                | Note                                   |
|-------------------------------------------|-------------------------------------------------|----------------------------------------|
| <i>Mavib-1</i> -OEF                       | TACACACACGCAAATCTAGAATGACCGAG<br>CTCCGAGGAGA    | Cloning <i>Mavib-1</i>                 |
| <i>Mavib-1</i> -OER                       | CTCACCATACTAGTCTCGAGAGCAGCTGT<br>CCACGAGTAGT    |                                        |
| <i>Mavib-1</i> -F2                        | TCAAGCCCGCAAAGAAAT                              | Verification                           |
| GFP-VR                                    | CGATGCGGTTACCAGGGTGT                            | Verification                           |
| <b>For transcription activation assay</b> |                                                 |                                        |
| <i>Mavib-1</i> -BD-F1                     | CTCAGAGGAGGACCTGCATATGATGATGA<br>CTACGGCAGCATA  | Cloning 5'-region of<br><i>Mavib-1</i> |
| <i>Mavib-1</i> -BD-R1                     | CGACGGATCCCCGGGAATTCGCGGGCTTG<br>AAAATTCCGTG    |                                        |
| <i>Mavib-1</i> -BD-F2                     | CTCAGAGGAGGACCTGCATATGAAAGAAA<br>TTCCTCTTCTTGGG | Cloning 3'-region of<br><i>Mavib-1</i> |
| <i>Mavib-1</i> -BD-R2                     | CGACGGATCCCCGGGAATTCAGCAGCTGT<br>CCACGAGTAGT    |                                        |
| BD-F                                      | TAATACGACTCACTATAGGG                            | Verification                           |
| BD-R                                      | TAAGAGTCACTTTAAAATTTGTATAC                      | Verification                           |
| <b>For and yeast one-hybrid assay</b>     |                                                 |                                        |
| <i>Mavib-1</i> -ADF                       | GTACCAGATTACGCTCATATGATGACCGAG<br>CTCCGAGGAGA   | Cloning CDS of<br><i>Mavib-1</i>       |
| <i>Mavib-1</i> -ADR                       | ACGATTCATCTGCAGCTCGAGAGCAGCTG<br>TCCACGAGTAGT   |                                        |
| P <i>vib</i> -pHIS2.1-YF                  | GACTCACTATAGGGCGAATTCGGGGCGAA<br>CTCGTGATAC     | Cloning promotor of<br><i>Mavib-1</i>  |
| P <i>vib</i> -pHIS2.1-YR                  | ATAATGCCAGGAATTACTAGTGGGGCCAA<br>GACATCATCATGG  |                                        |

| Primer name         | Sequence (5'-3')        | Note         |
|---------------------|-------------------------|--------------|
| AD-F                | TAATACGACTCACTATAGGG    | Verification |
| AD-R                | AGATGGTGCACGATGCACAG    | Verification |
| <b>For RT-qPCR</b>  |                         |              |
| <i>gpd</i> -qF      | GACTGCCCCGCATTGAGAAG    | 149 bp       |
| <i>gpd</i> -qR      | AGATGGAGGAGTTGGTGTTC    |              |
| <i>Mavib-1</i> -qF2 | GTAGGTGATGTCTCGCCAGG    | 228 bp       |
| <i>Mavib-1</i> -qR2 | AGCAGCTGTCCACGAGTAGTT   |              |
| MAC_08063-qF        | CTTCAGACGAACCAGATT      | 154 bp       |
| MAC_08063-qR        | TACCTTTCCGAGATTCCT      |              |
| MAC_02470-qF        | AATATAAGCACTCGTCCTAC    | 176 bp       |
| MAC_02470-qR        | TCTGACATTGGTTGACTG      |              |
| MAC_00601-qF        | GTATTGCTCCGAGTTCTT      | 143 bp       |
| MAC_00601-qR        | CCAAGTCTTCCAGATTCC      |              |
| MAC_04059-qF        | GACTGATTGACCTGTTCT      | 81 bp        |
| MAC_04059-qR        | CATTCTCCGTGCTCTTAT      |              |
| MAC_09082-qF        | AGGTTCCAAGGCAGTATA      | 190 bp       |
| MAC_09082-qR        | GCGTAGATAGGTGATTAGTT    |              |
| MAC_00973-qF        | GAGTGGATTGAGAGTTATGA    | 176 bp       |
| MAC_00973-qR        | GTTATACTGAATACAAGAAGGAA |              |
| MAC_08024-qF        | GCCTCAAGTATATCCATTCA    | 147 bp       |
| MAC_08024-qR        | TGTATCCAGCATTCTCTTC     |              |
| MAC_08053-qF        | TGGCACCATTACATATCG      | 110 bp       |
| MAC_08053-qR        | CAGAGTTGTTCTTCTTCATC    |              |

| Primer name  | Sequence (5'-3')     | Note   |
|--------------|----------------------|--------|
| MAC_04751-qF | CAAGTTTTACACCGACAG   | 82 bp  |
| MAC_04751-qR | CTCCTGCTTCTTCAGATC   |        |
| MAC_08084-qF | GAAGTAGACATCTGGAGTG  | 102 bp |
| MAC_08084-qR | GGTGATGATGGAGAACTG   |        |
| MAC_02310-qF | TGAGGAAGATGAGAATGAC  | 118 bp |
| MAC_02310-qR | GACAGTTGGAGGTGTATC   |        |
| MAC_02260-qF | CGAAAGCAGAGCATAATAC  | 191 bp |
| MAC_02260-qR | GTGGAAGATGACTTGACA   |        |
| MAC_02103-qF | CTCTTCACATCCACCATT   | 130 bp |
| MAC_02103-qR | GGCAATTATCCTCACTCA   |        |
| MAC_04776-qF | CGAGTCCAAGGAAGAATT   | 147 bp |
| MAC_04776-qR | ATGTTTCGCATAGATGAGAG |        |
| MAC_07045-qF | CCGATTCCTCATCTTCAA   | 137 bp |
| MAC_07045-qR | CGTCAATACACTGTTCAAC  |        |
| MAC_04310-qF | CAGCGAATTGTCTTGAAC   | 197 bp |
| MAC_04310-qR | GTGGTGGAAGTAGTCTTG   |        |
| MAC_01493-qF | TCTGTATCCTGGTGAGAA   | 180 bp |
| MAC_01493-qR | ATGGTATGCTGGTAGTATTC |        |
| MAC_05385-qF | G TTCAGGCAGGTATAGATG | 172 bp |
| MAC_05385-qR | ACTCAATGGCTTCTTCAG   |        |
| MAC_02654-qF | CCATGCAGTGAAAGAAAG   | 112 bp |
| MAC_02654-qR | GAATGTGTTTGCCTTCTG   |        |
| MAC_01225-qF | CGCCATTGTCTCTATTCT   | 126 bp |

| Primer name  | Sequence (5'-3')       | Note   |
|--------------|------------------------|--------|
| MAC_01225-qR | ACGACTCCAAGATTGAAG     |        |
| MAC_06584-qF | ATGGACTCACTCAAGGAA     | 114 bp |
| MAC_06584-qR | GAGAGGTGCGTCAGATT      |        |
| MAC_08011-qF | GGAAGAAGTTCAGGAGATT    | 98 bp  |
| MAC_08011-qR | GTGATGCTATGTCTCTCTT    |        |
| MAC_09507-qF | ATGCAGTTCCTCGCTGTTGC   | 112 bp |
| MAC_09507-qR | ACTGGGGATTGCTGTAAAGACC |        |
| MAC_04217-qF | CATTCACAATCACCAGGAT    | 81 bp  |
| MAC_04217-qR | TTCTGCTGACGAGAGTAG     |        |
| MAC_07741-qF | TCAACCGAGAGGAGATTC     | 83 bp  |
| MAC_07741-qR | GGTGAAGTGGATTGTGTT     |        |
| MAC_09703-qF | GAAATCTTGACTGTAAATG    | 96 bp  |
| MAC_09703-qR | CGTAATAGAGGTAATGAC     |        |
| MAC_05034-qF | CTGATTGAGAAGGAAGTC     | 108 bp |
| MAC_05034-qR | AACCGTAATCTTGTCATC     |        |
| MAC_03969-qF | ATGGATCTCTGACGGATA     | 98 bp  |
| MAC_03969-qR | GACTTGGACTTCTGTGAT     |        |
| MAC_04003-qF | TGCTGAGCCAGTATCTTG     | 80 bp  |
| MAC_04003-qR | ACTGATAGAATGCCTCCG     |        |
| MAC_04467-qF | CTTATTGTCTACGACCATA    | 90 bp  |
| MAC_04467-qR | CGAGTCATAGCAAGTAAT     |        |
| MAC_07994-qF | GATGATGTTACTCCAAGA     | 111 bp |
| MAC_07994-qR | ATTGTATCGGCTATTGAA     |        |

| Primer name  | Sequence (5'-3')     | Note   |
|--------------|----------------------|--------|
| MAC_06320-qF | TTACTAACGAGCATCATAG  | 81 bp  |
| MAC_06320-qR | GGCATATTCTGTGTCTAC   |        |
| MAC_09677-qF | CTGTTCTTTGGCATATTCC  | 80 bp  |
| MAC_09677-qR | GTAGCGTAAGGTTGGTAG   |        |
| MAC_06613-qF | CAAGAACATTGCGGATAT   | 84 bp  |
| MAC_06613-qR | CAGAACAGTGTCAGAAT    |        |
| MAC_01182-qF | ACTACCTACAGAAGCAACA  | 133 bp |
| MAC_01182-qR | GCCGTCCACTACTCATT    |        |
| MAC_09277-qF | AACTCGTCAACCAGATAC   | 97 bp  |
| MAC_09277-qR | ACTCTTGGACATTGTAGG   |        |
| MAC_04872-qF | GCACGGGATACATCTTCT   | 83 bp  |
| MAC_04872-qR | GGCAATGAATGAGCAGAA   |        |
| MAC_07255-qF | AATTGGTTGGCTTGTTCA   | 110 bp |
| MAC_07255-qR | AAGAGTAAGTAAGGCGTAGA |        |
| MAC_00224-qF | ATACTACGGCTCTGAATG   | 102 bp |
| MAC_00224-qR | CAGCATAAGCAATCATAAGA |        |
| MAC_00986-qF | AGCGTGTATTTCTCCTTG   | 83 bp  |
| MAC_00986-qR | CTTGCCTTGTTCTGACTAA  |        |
| MAC_06364-qF | TTTCTTCCCACGAGGTTT   | 84 bp  |
| MAC_06364-qR | GTGTAGGTGTCAAAGTCATC |        |
| MAC_04557-qF | TTCCTCTTCTCCAGTGTT   | 112 bp |
| MAC_04557-qR | GAATAGTCCAGCAAGTGAT  |        |
| MAC_05902-qF | CATCAAGGAGACTCTTAC   | 120 bp |

| Primer name  | Sequence (5'-3')     | Note  |
|--------------|----------------------|-------|
| MAC_05902-qR | TCCATATCAACAGACATT   |       |
| MAC_04556-qF | GCCTATGTGGTGTATGAA   | 89 bp |
| MAC_04556-qR | ATGACGCAGACAATGAAT   |       |
| MAC_08199-qF | CCCATCATAATCCGCTTT   | 95 bp |
| MAC_08199-qR | TGCCTAAGACTAACATTGAG |       |
| MAC_08197-qF | GTGCTGTGATTGTTAGTG   | 81 bp |
| MAC_08197-qR | AGAGAATGGCAAGAATGA   |       |



Table S2 Verification of DEGs results by RT-qPCR analysis

| Gene Symbol | Product name                                                   | DGE<br><i>ΔMavib-1</i> | RT-qPCR<br><i>ΔMavib-1</i> | DGE<br><i>Mavib-1</i><br>OE | RT-qPCR<br><i>Mavib-1</i><br>OE |
|-------------|----------------------------------------------------------------|------------------------|----------------------------|-----------------------------|---------------------------------|
| MAC_04217   | heat shock protein 30                                          | -3.49                  | -3.17                      | -1.93                       | -1.61                           |
| MAC_07741   | putative cytochrome P450 3A7                                   | -2.40                  | -2.13                      | -1.63                       | -1.37                           |
| MAC_09703   | FAD binding<br>domain-containing protein                       | -1.94                  | -1.26                      | 3.07                        | 3.57                            |
| MAC_05034   | heat shock protein 101                                         | -1.76                  | -1.42                      | -2.13                       | -4.72                           |
| MAC_03969   | G-protein coupled receptor                                     | -1.74                  | -1.54                      | -1.06                       | -0.53                           |
| MAC_04003   | xylitol dehydrogenase                                          | -1.68                  | -1.18                      | 1.55                        | 1.41                            |
| MAC_04467   | laccase Lcc5                                                   | -1.58                  | -1.62                      | 2.69                        | 2.12                            |
| MAC_07994   | alpha-1,2 mannosyltransferase<br>KTR1                          | -1.57                  | -1.83                      | -1.66                       | -1.27                           |
| MAC_06320   | aspartic proteinase                                            | -1.39                  | -1.54                      | 1.34                        | 0.66                            |
| MAC_09677   | ferrichrome-type siderophore<br>transporter                    | -1.39                  | -1.21                      | 1.50                        | 1.13                            |
| MAC_06613   | xenobiotic compound<br>monooxygenase, DszA family,<br>putative | -1.25                  | -1.41                      | 1.31                        | 1.66                            |
| MAC_01182   | MedA                                                           | -1.20                  | -1.96                      | 2.07                        | 2.90                            |
| MAC_09277   | glutamyl-tRNA(Gln)<br>amidotransferase                         | -1.19                  | -1.11                      | 1.27                        | 1.66                            |
| MAC_04872   | urea active transporter                                        | 1.12                   | 0.84                       | -1.25                       | -1.06                           |
| MAC_07255   | polysaccharide synthase Cps1,<br>putative                      | 1.29                   | 0.86                       | 2.00                        | 2.24                            |
| MAC_00224   | GAL4 & Fungal specific                                         | -1.66                  | -1.53                      | -1.28                       | -0.13                           |

| Gene Symbol | Product name                                           | DGE<br><i>ΔMavib-1</i> | RT-qPCR<br><i>ΔMavib-1</i> | DGE<br><i>Mavib-1</i><br>OE | RT-qPCR<br><i>Mavib-1</i><br>OE |
|-------------|--------------------------------------------------------|------------------------|----------------------------|-----------------------------|---------------------------------|
|             | transcription factor domain<br>containing protein      |                        |                            |                             |                                 |
| MAC_00986   | phenylacetyl-CoA ligase                                | -1.37                  | -0.94                      | 1.27                        | 2.27                            |
| MAC_06364   | heat shock protein 30                                  | -3.44                  | -3.56                      | -2.15                       | -2.43                           |
| MAC_04557   | putative<br>nucleoside-diphosphate-sugar<br>epimerase  | 0.00                   | 0.69                       | 10.05                       | 10.68                           |
| MAC_05902   | carboxyphosphoenolpyruvate<br>phosphonmutase, putative | 0.00                   | -0.30                      | 7.68                        | 7.97                            |
| MAC_04556   | siderophore iron transporter,<br>putative              | -1.69                  | -0.62                      | 6.35                        | 7.56                            |
| MAC_08199   | aldehyde dehydrogenase                                 | 0.25                   | 0.34                       | 5.96                        | 6.11                            |
| MAC_08197   | MFS monocarboxylate<br>transporter, putative           | -0.17                  | -0.25                      | 5.89                        | 6.16                            |

Table S3 DEGs of  $\Delta Mavib-1$  compared to WT cultured on SYA medium for 20 h

| Gene Symbol                | Description                                      | $\log_2(\Delta Mavib-1 / WT)$ |
|----------------------------|--------------------------------------------------|-------------------------------|
| <b>CAZyme</b>              |                                                  |                               |
| MAC_05562                  | alpha-galactosidase                              | -1.14                         |
| MAC_07255                  | polysaccharide synthase Cps1, putative           | 1.29                          |
| MAC_03417                  | acetyl-hydrolase                                 | -1.35                         |
| MAC_06283                  | acid trehalase                                   | -1.19                         |
| MAC_07994                  | alpha-1,2 mannosyltransferase KTR1               | -1.57                         |
| MAC_09197                  | beta-1,6-glucanase                               | -1.34                         |
| MAC_02929                  | homoserine acetyltransferase family protein      | -1.01                         |
| MAC_09703                  | isoamyl alcohol oxidase, putative                | -1.94                         |
| MAC_07244                  | putative multicopperoxidase                      | 1.08                          |
| <b>Carbon metabolism</b>   |                                                  |                               |
| MAC_09529                  | oxidoreductase, zinc-binding protein             | -1.28                         |
| MAC_08191                  | ribose-phosphate pyrophosphokinase               | 1.14                          |
| MAC_02565                  | phosphoethanolamine transferase PIGF             | -1.07                         |
| MAC_01637                  | acetoacetyl-CoA synthase                         | -1.12                         |
| MAC_04200                  | alcohol dehydrogenase, putative                  | -1.15                         |
| MAC_01403                  | hexose transport-related protein                 | -2.16                         |
| <b>Nitrogen metabolism</b> |                                                  |                               |
| MAC_06383                  | aspartate carbamoyltransferase catalytic subunit | 1.11                          |
| MAC_06029                  | ornithine decarboxylase                          | 1.03                          |
| MAC_05125                  | S-adenosylmethionine decarboxylase proenzyme     | 1.09                          |
| MAC_04872                  | urea active transporter                          | 1.12                          |

| Gene Symbol                                       | Description                                       | log <sub>2</sub> ( $\Delta$ Mavib-1 / WT) |
|---------------------------------------------------|---------------------------------------------------|-------------------------------------------|
| MAC_05344                                         | urea transporter                                  | 1.01                                      |
| MAC_07491                                         | urease                                            | 1.00                                      |
| MAC_03493                                         | nitrite reductase                                 | 1.36                                      |
| MAC_06321                                         | NmrA family protein                               | -1.90                                     |
| MAC_09768                                         | Amino-acid permease inda1                         | 1.03                                      |
| MAC_05400                                         | aspartate aminotransferase, putative              | 9.28                                      |
| MAC_06320                                         | aspartic proteinase                               | -1.39                                     |
| MAC_09277                                         | glutamyl-tRNA(Gln) amidotransferase               | -1.19                                     |
| <b>Lipid metabolism</b>                           |                                                   |                                           |
| MAC_02669                                         | fatty acid desaturase                             | -1.28                                     |
| MAC_09815                                         | fatty acid-binding protein FABP, putative         | -2.05                                     |
| MAC_07120                                         | cytochrome P450 52A11                             | -1.94                                     |
| MAC_09276                                         | cytochrome P450 52A12                             | -1.05                                     |
| MAC_01100                                         | cytochrome P450 oxidoreductase, putative          | -1.10                                     |
| <b>Signal transduction and gene transcription</b> |                                                   |                                           |
| MAC_04218                                         | DNA repair protein RAD51                          | -1.12                                     |
| MAC_09046                                         | trypsin-related protease                          | -1.82                                     |
| MAC_06833                                         | trypsin-related protease                          | -1.10                                     |
| MAC_00386                                         | DNA topoisomerase III                             | 1.02                                      |
| MAC_02831                                         | DNA-dependent RNA polymerase I subunit A43        | 1.06                                      |
| MAC_07811                                         | DNA-directed RNA polymerase I 135 kDa polypeptide | 1.02                                      |
| MAC_05663                                         | RNA polymerase III subunit RPC82                  | 1.04                                      |
| MAC_05264                                         | RNA-3'-phosphate cyclase family protein           | 1.12                                      |

| Gene Symbol                  | Description                                                           | log <sub>2</sub> ( $\Delta$ Mavib-1 / WT) |
|------------------------------|-----------------------------------------------------------------------|-------------------------------------------|
| MAC_01287                    | rRNA processing protein Bystin, putative                              | 1.06                                      |
| MAC_01993                    | Superoxide dismutase                                                  | 1.09                                      |
| MAC_03969                    | G-protein coupled receptor                                            | -1.74                                     |
| MAC_01182                    | MedA                                                                  | -1.20                                     |
| MAC_04517                    | bZIP transcription factor                                             | 1.80                                      |
| MAC_00302                    | C2 domain protein                                                     | -1.00                                     |
| MAC_08825                    | C2H2 finger domain protein FlbC                                       | -1.35                                     |
| MAC_03046                    | C2H2 finger domain protein, putative                                  | -1.26                                     |
| MAC_08573                    | C2H2 finger domain protein, putative                                  | 1.11                                      |
| MAC_09257                    | C6 and C2H2 transcription factor RegA-like protein                    | -1.07                                     |
| MAC_02667                    | C6 transcription factor, putative                                     | -1.11                                     |
| MAC_05515                    | C6 transcription factor, putative                                     | 1.01                                      |
| MAC_04528                    | C6 zinc finger domain protein                                         | -1.24                                     |
| MAC_07846                    | calcium-transporting ATPase 3                                         | -1.64                                     |
| MAC_00224                    | GAL4 & Fungal specific transcription factor domain containing protein | -1.66                                     |
| MAC_04865                    | swim zinc finger domain protein                                       | -1.22                                     |
| MAC_03911                    | AN1-type zinc finger protein                                          | -1.04                                     |
| MAC_08402                    | Cutinase transcription factor 1 beta                                  | -1.05                                     |
| MAC_04569                    | gag protein                                                           | -1.02                                     |
| MAC_06589                    | putative DNA-binding protein                                          | -1.48                                     |
| MAC_04099                    | MYB DNA-binding domain-containing protein                             | -1.03                                     |
| <b>Pathogenicity related</b> |                                                                       |                                           |
| MAC_00987                    | adhesin protein Mad1                                                  | 1.95                                      |

| Gene Symbol | Description                                                   | log <sub>2</sub> ( $\Delta$ <i>Mavib-1</i> / WT) |
|-------------|---------------------------------------------------------------|--------------------------------------------------|
| MAC_07558   | major allergen Asp f 2-like protein                           | 2.15                                             |
| MAC_01990   | short chain dehydrogenase                                     | -1.44                                            |
| MAC_04315   | putative ATP-dependent helicase                               | -1.24                                            |
| MAC_00595   | cytochrome P450, putative                                     | -1.36                                            |
| MAC_03401   | YT521-B-like family protein                                   | -1.16                                            |
| MAC_00775   | putative chloroperoxidase                                     | -1.05                                            |
| MAC_01566   | MFS monosaccharide transporter, putative                      | -1.33                                            |
| MAC_00237   | MHYT domain signaling protein, putative                       | 1.09                                             |
| MAC_07386   | ab-hydrolase associated lipase, putative                      | -1.09                                            |
| MAC_09538   | putative Ca <sup>2+</sup> /H <sup>+</sup> -exchanging protein | -1.46                                            |
| MAC_05031   | interferon-induced GTP-binding protein Mx                     | -1.69                                            |
| MAC_05732   | cytochrome P450                                               | 1.63                                             |
| MAC_08514   | flotillin domain containing protein                           | -1.76                                            |
| MAC_00947   | MFS transporter                                               | 1.14                                             |
| MAC_04467   | laccase Lcc5                                                  | -1.58                                            |
| MAC_09362   | phosphate-repressible phosphate permease                      | 1.33                                             |
| MAC_05040   | candidapepsin-4 precursor                                     | -2.49                                            |
| MAC_07597   | beta-lactamase, putative                                      | -1.58                                            |
| MAC_08908   | glutaminyI-tRNA synthetase                                    | 1.62                                             |
| MAC_03963   | multidrug resistant protein                                   | 1.01                                             |
| MAC_09677   | ferrichrome-type siderophore transporter                      | -1.39                                            |
| MAC_04887   | putative aspartic endopeptidase                               | -1.16                                            |
| MAC_07124   | PAP2 domain containing protein                                | -1.48                                            |



| Gene Symbol                               | Description                                 | log <sub>2</sub> ( $\Delta$ <i>Mavib-1</i> / WT) |
|-------------------------------------------|---------------------------------------------|--------------------------------------------------|
| MAC_01765                                 | key lime pathogenicity protein              | -1.48                                            |
| MAC_04122                                 | MFS transporter, putative                   | -1.10                                            |
| MAC_00287                                 | penicillin-binding protein, putative        | -3.44                                            |
| MAC_07309                                 | putative P-type ATPase                      | -1.59                                            |
| MAC_06859                                 | MFS multidrug transporter, putative         | -1.57                                            |
| MAC_07357                                 | cytochrome P450 3A17                        | -1.00                                            |
| <b>Cell wall integrity</b>                |                                             |                                                  |
| MAC_03694                                 | WSC domain protein, putative                | 1.09                                             |
| MAC_07327                                 | chitinase                                   | 1.12                                             |
| MAC_06488                                 | glycine-rich cell wall structural protein 1 | -1.01                                            |
| <b>Stress response and detoxification</b> |                                             |                                                  |
| MAC_05034                                 | heat shock protein 101                      | -1.76                                            |
| MAC_04217                                 | heat shock protein 30                       | -3.49                                            |
| MAC_06364                                 | heat shock protein 30                       | -3.44                                            |
| MAC_07086                                 | heat shock protein 78 precursor             | -1.60                                            |
| MAC_02364                                 | Hsp40 co-chaperone Jid1, putative           | -1.76                                            |
| <b>Membrane protein</b>                   |                                             |                                                  |
| MAC_06214                                 | integral membrane protein                   | -1.99                                            |
| MAC_06538                                 | integral membrane protein                   | -1.90                                            |
| MAC_08540                                 | integral membrane protein                   | -1.29                                            |
| MAC_02040                                 | ankyrin repeat containing protein           | -1.27                                            |
| MAC_02332                                 | ankyrin repeat protein                      | -1.24                                            |
| <b>Cellular transport</b>                 |                                             |                                                  |

| Gene Symbol                      | Description                                                            | log <sub>2</sub> ( $\Delta$ Mavib-1 / WT) |
|----------------------------------|------------------------------------------------------------------------|-------------------------------------------|
| MAC_01878                        | ABC transporter (Adp1)                                                 | -1.23                                     |
| MAC_00267                        | ABC-type Fe <sup>3+</sup> transport system                             | -1.08                                     |
| MAC_03697                        | ABC multidrug transporter Mdr1                                         | -1.19                                     |
| MAC_08884                        | allantoate transport protein                                           | 1.16                                      |
| MAC_00825                        | anion exchange protein, putative                                       | -1.09                                     |
| <b>Other cellular metabolism</b> |                                                                        |                                           |
| MAC_03200                        | 3-beta hydroxysteroid dehydrogenase/isomerase family protein, putative | -1.15                                     |
| MAC_02212                        | 3-oxoacyl-(acyl carrier protein) reductase                             | -1.59                                     |
| MAC_02812                        | 60S ribosome biogenesis protein Mak11, putative                        | 1.20                                      |
| MAC_02449                        | amidase                                                                | 1.07                                      |
| MAC_00212                        | AMP-binding enzyme, putative                                           | -1.12                                     |
| MAC_04991                        | anthranilate synthase component II                                     | -1.49                                     |
| MAC_01012                        | ATP synthase gamma chain precursor                                     | -1.08                                     |
| MAC_00676                        | ATP-dependent RNA helicase DBP7, putative                              | 1.00                                      |
| MAC_01598                        | ATP-dependent RNA helicase dbp9                                        | 1.10                                      |
| MAC_05846                        | benzoate 4-monooxygenase cytochrome P450                               | -1.05                                     |
| MAC_05050                        | Brix domain containing protein                                         | 1.29                                      |
| MAC_07655                        | conserved glycine-rich protein                                         | -2.26                                     |
| MAC_01196                        | cysteine synthase B, putative                                          | 1.23                                      |
| MAC_00603                        | cysteine synthase K/M:Cysteine synthase B                              | 1.65                                      |
| MAC_06738                        | D-aminoacylase                                                         | -1.12                                     |
| MAC_09268                        | delta 8-(E)-sphingolipid desaturase, putative                          | -2.71                                     |
| MAC_04228                        | DRAP deaminase                                                         | -1.83                                     |

| Gene Symbol | Description                                         | log <sub>2</sub> ( $\Delta$ <i>Mavib-1</i> / WT) |
|-------------|-----------------------------------------------------|--------------------------------------------------|
| MAC_01700   | dual specificity phosphatase, putative              | 1.23                                             |
| MAC_08416   | DUF221 domain protein, putative                     | -1.25                                            |
| MAC_01972   | DUF500 domain protein                               | -1.51                                            |
| MAC_09081   | eukaryotic ribosome biogenesis protein 1            | 1.00                                             |
| MAC_09358   | extracellular dioxygenase, putative                 | -3.34                                            |
| MAC_03642   | extracellular serine-rich protein                   | -1.07                                            |
| MAC_02143   | extracellular serine-rich protein, putative         | 1.23                                             |
| MAC_01118   | FAD linked oxidase domain protein                   | -1.34                                            |
| MAC_05270   | ferric reductase transmembrane component, putative  | -1.56                                            |
| MAC_04988   | feruloyl esterase B precursor, putative             | -1.10                                            |
| MAC_06853   | flavohemoglobin                                     | 2.03                                             |
| MAC_02061   | GABA permease, putative                             | 1.02                                             |
| MAC_04028   | gibberellin 20-oxidase, putative                    | -2.28                                            |
| MAC_00081   | glycerophosphodiester phosphodiesterase GDE1        | 1.13                                             |
| MAC_02360   | Glyoxalase/bleomycin resistance protein/dioxygenase | -2.00                                            |
| MAC_09200   | GNAT family acetyltransferase, putative             | -1.02                                            |
| MAC_04576   | HMG box protein, putative                           | -1.21                                            |
| MAC_07139   | La domain family                                    | 1.03                                             |
| MAC_02908   | Leucine Rich Repeat domain protein                  | -1.03                                            |
| MAC_01117   | MFS monocarboxylate transporter, putative           | -1.33                                            |
| MAC_00551   | Mitochondrial protein cyt-4                         | 1.04                                             |
| MAC_06616   | oligopeptide transporter                            | 1.14                                             |
| MAC_06818   | oligopeptide transporter OPT-like protein           | -1.01                                            |

| Gene Symbol | Description                                                            | log <sub>2</sub> (Δ <i>Mavib-1</i> / WT) |
|-------------|------------------------------------------------------------------------|------------------------------------------|
| MAC_02365   | PAF acetylhydrolase family protein                                     | -2.27                                    |
| MAC_02362   | pantetheine-phosphate adenylyltransferase family protein               | -1.06                                    |
| MAC_00986   | phenylacetyl-CoA ligase                                                | -1.37                                    |
| MAC_05950   | plasma membrane calcium-transporting ATPase 2                          | -1.48                                    |
| MAC_07325   | PQQ repeat containing protein                                          | 1.24                                     |
| MAC_00853   | Pre-rRNA-processing protein ipi1                                       | 1.15                                     |
| MAC_06592   | proline oxidase PrnD                                                   | -1.15                                    |
| MAC_07223   | Pumilio-family RNA binding repeat protein                              | -1.20                                    |
| MAC_03984   | putative CHIP protein (carboxyl terminus of Hsc70-interacting protein) | -1.03                                    |
| MAC_07741   | putative cytochrome P450 3A7                                           | -2.40                                    |
| MAC_08753   | putative fzf protein                                                   | -1.04                                    |
| MAC_07245   | putative iron transferase                                              | 1.54                                     |
| MAC_03601   | putative LTE1 protein                                                  | -1.27                                    |
| MAC_07376   | putative nucleoside-diphosphate-sugar epimerase                        | -1.23                                    |
| MAC_01101   | putative polyketide synthase protein                                   | -1.17                                    |
| MAC_01902   | putative protein kinase                                                | -1.12                                    |
| MAC_09438   | putative rna-binding protein fus/tls                                   | -1.26                                    |
| MAC_07473   | pyridoxine                                                             | 1.20                                     |
| MAC_00381   | QDE-2-interacting protein                                              | -1.08                                    |
| MAC_01768   | riboflavine-aldehyde-forming enzyme                                    | -1.37                                    |
| MAC_01432   | RTA1 domain protein, putative                                          | -1.02                                    |
| MAC_08291   | serine peptidase, putative                                             | -1.23                                    |

| Gene Symbol    | Description                                               | log <sub>2</sub> ( $\Delta$ Mavib-1 / WT) |
|----------------|-----------------------------------------------------------|-------------------------------------------|
| MAC_01900      | serine/threonine protein kinase, putative                 | -1.19                                     |
| MAC_06605      | short-chain dehydrogenases/reductase, putative            | -1.48                                     |
| MAC_00723      | SNF2 family helicase/ATPase, putative                     | -1.08                                     |
| MAC_01251      | snoRNP assembly factor Naf1, putative                     | 1.16                                      |
| MAC_04418      | srpk, putative                                            | -2.26                                     |
| MAC_03596      | stomatin-like protein                                     | -1.65                                     |
| MAC_06739      | sulfatase domain protein                                  | -1.66                                     |
| MAC_08642      | sulfonate biosynthesis enzyme, putative                   | -1.29                                     |
| MAC_08251      | SWIRM domain-containing protein                           | -1.65                                     |
| MAC_03313      | transposase-like protein                                  | -1.63                                     |
| MAC_05232      | TruB family pseudouridylate synthase containing protein   | 1.23                                      |
| MAC_04822      | U-box domain-containing protein                           | -1.46                                     |
| MAC_07254      | von Willebrand factor                                     | -1.21                                     |
| MAC_06613      | xenobiotic compound monooxygenase, DszA family, putative  | -1.25                                     |
| MAC_04216      | YT521-B-like splicing factor, putative                    | -1.72                                     |
| MAC_05073      | zinc-containing alcohol dehydrogenase superfamily protein | 1.49                                      |
| MAC_02279      | dipeptidyl peptidase III                                  | -1.41                                     |
| <b>Unknown</b> |                                                           |                                           |
| MAC_08795      | hypothetical protein                                      | -2.30                                     |
| MAC_04300      | hypothetical protein                                      | -2.26                                     |
| MAC_07873      | hypothetical protein                                      | -2.20                                     |

| Gene Symbol | Description          | $\log_2(\Delta Mavib-1 / WT)$ |
|-------------|----------------------|-------------------------------|
| MAC_07534   | hypothetical protein | -2.16                         |
| MAC_00652   | hypothetical protein | -2.14                         |
| MAC_05220   | hypothetical protein | -2.13                         |
| MAC_07886   | hypothetical protein | -2.02                         |
| MAC_03029   | hypothetical protein | -2.01                         |
| MAC_05271   | hypothetical protein | -2.00                         |
| MAC_07160   | hypothetical protein | -1.99                         |
| MAC_02185   | hypothetical protein | -1.95                         |
| MAC_08454   | hypothetical protein | -1.93                         |
| MAC_03214   | hypothetical protein | -1.93                         |
| MAC_00278   | hypothetical protein | -1.85                         |
| MAC_06322   | hypothetical protein | -1.85                         |
| MAC_05450   | hypothetical protein | -1.76                         |
| MAC_07632   | hypothetical protein | -1.75                         |
| MAC_03022   | hypothetical protein | -1.75                         |
| MAC_09762   | hypothetical protein | -1.74                         |
| MAC_05428   | hypothetical protein | -1.71                         |
| MAC_08975   | hypothetical protein | -1.70                         |
| MAC_04003   | hypothetical protein | -1.68                         |
| MAC_06767   | hypothetical protein | -1.66                         |
| MAC_02363   | hypothetical protein | -1.64                         |
| MAC_00389   | hypothetical protein | -1.64                         |
| MAC_00556   | hypothetical protein | -1.64                         |



| Gene Symbol | Description          | log <sub>2</sub> ( $\Delta$ <i>Mavib-1</i> / WT) |
|-------------|----------------------|--------------------------------------------------|
| MAC_03407   | hypothetical protein | -1.62                                            |
| MAC_07094   | hypothetical protein | -1.61                                            |
| MAC_04679   | hypothetical protein | -1.60                                            |
| MAC_02266   | hypothetical protein | -1.60                                            |
| MAC_02330   | hypothetical protein | -1.55                                            |
| MAC_08509   | hypothetical protein | -1.51                                            |
| MAC_08464   | hypothetical protein | -1.47                                            |
| MAC_03372   | hypothetical protein | -1.43                                            |
| MAC_06367   | hypothetical protein | -1.40                                            |
| MAC_00209   | hypothetical protein | -1.39                                            |
| MAC_08530   | hypothetical protein | -1.36                                            |
| MAC_06553   | hypothetical protein | -1.35                                            |
| MAC_07293   | hypothetical protein | -1.34                                            |
| MAC_05151   | hypothetical protein | -1.33                                            |
| MAC_03039   | hypothetical protein | -1.32                                            |
| MAC_01994   | hypothetical protein | -1.30                                            |
| MAC_04127   | hypothetical protein | -1.29                                            |
| MAC_09106   | hypothetical protein | -1.29                                            |
| MAC_01354   | hypothetical protein | -1.28                                            |
| MAC_05573   | hypothetical protein | -1.27                                            |
| MAC_07417   | hypothetical protein | -1.26                                            |
| MAC_05445   | hypothetical protein | -1.25                                            |
| MAC_01086   | hypothetical protein | -1.25                                            |

| Gene Symbol | Description          | log <sub>2</sub> (Δ <i>Mavib-1</i> / WT) |
|-------------|----------------------|------------------------------------------|
| MAC_02361   | hypothetical protein | -1.23                                    |
| MAC_04727   | hypothetical protein | -1.23                                    |
| MAC_03096   | hypothetical protein | -1.22                                    |
| MAC_01769   | hypothetical protein | -1.21                                    |
| MAC_07670   | hypothetical protein | -1.20                                    |
| MAC_08505   | hypothetical protein | -1.19                                    |
| MAC_00294   | hypothetical protein | -1.17                                    |
| MAC_05020   | hypothetical protein | -1.17                                    |
| MAC_04322   | hypothetical protein | -1.16                                    |
| MAC_09283   | hypothetical protein | -1.15                                    |
| MAC_08164   | hypothetical protein | -1.14                                    |
| MAC_07288   | hypothetical protein | -1.13                                    |
| MAC_02638   | hypothetical protein | -1.13                                    |
| MAC_06604   | hypothetical protein | -1.11                                    |
| MAC_06148   | hypothetical protein | -1.10                                    |
| MAC_04227   | hypothetical protein | -1.09                                    |
| MAC_09581   | hypothetical protein | -1.09                                    |
| MAC_01851   | hypothetical protein | -1.09                                    |
| MAC_03241   | hypothetical protein | -1.08                                    |
| MAC_03959   | hypothetical protein | -1.07                                    |
| MAC_07101   | hypothetical protein | -1.06                                    |
| MAC_08396   | hypothetical protein | -1.06                                    |
| MAC_05993   | hypothetical protein | -1.06                                    |

| Gene Symbol | Description          | log <sub>2</sub> ( $\Delta$ <i>Mavib-1</i> / WT) |
|-------------|----------------------|--------------------------------------------------|
| MAC_04561   | hypothetical protein | -1.04                                            |
| MAC_02096   | hypothetical protein | -1.03                                            |
| MAC_05236   | hypothetical protein | -1.01                                            |
| MAC_02662   | hypothetical protein | -1.01                                            |
| MAC_04780   | hypothetical protein | -1.01                                            |
| MAC_01912   | hypothetical protein | -1.00                                            |
| MAC_09177   | hypothetical protein | -1.00                                            |
| MAC_06504   | hypothetical protein | 1.02                                             |
| MAC_06170   | hypothetical protein | 1.03                                             |
| MAC_06328   | hypothetical protein | 1.03                                             |
| MAC_07383   | hypothetical protein | 1.04                                             |
| MAC_02832   | hypothetical protein | 1.04                                             |
| MAC_02678   | hypothetical protein | 1.04                                             |
| MAC_05729   | hypothetical protein | 1.05                                             |
| MAC_00611   | hypothetical protein | 1.10                                             |
| MAC_04761   | hypothetical protein | 1.11                                             |
| MAC_06123   | hypothetical protein | 1.12                                             |
| MAC_08357   | hypothetical protein | 1.13                                             |
| MAC_03993   | hypothetical protein | 1.14                                             |
| MAC_05109   | hypothetical protein | 1.14                                             |
| MAC_01549   | hypothetical protein | 1.14                                             |
| MAC_03111   | hypothetical protein | 1.19                                             |
| MAC_08284   | hypothetical protein | 1.46                                             |

| Gene Symbol | Description          | $\log_2(\Delta Mavib-1 / WT)$ |
|-------------|----------------------|-------------------------------|
| MAC_05976   | hypothetical protein | 1.52                          |
| MAC_07661   | hypothetical protein | 1.99                          |
| MAC_07182   | hypothetical protein | 2.16                          |
| MAC_02556   | hypothetical protein | 2.39                          |
| MAC_05319   | hypothetical protein | 2.79                          |
| MAC_00391   | hypothetical protein | 3.49                          |
| MAC_07499   | hypothetical protein | 6.61                          |
| MAC_07302   | hypothetical protein | -1.63                         |

Table S4 DEGs of *Mavib-I* in OE compared to WT cultured on SYA medium for 20 h

| Gene Symbol   | Description                                         | log <sub>2</sub> (OE/WT) |
|---------------|-----------------------------------------------------|--------------------------|
| <b>CAZyme</b> |                                                     |                          |
| MAC_01220     | alcohol dehydrogenase                               | 1.65                     |
| MAC_09392     | 1,2-a-D-mannosidase                                 | 1.12                     |
| MAC_03417     | acetyl-hydrolase                                    | -1.05                    |
| MAC_07113     | alpha/beta hydrolase fold domain containing protein | 1.62                     |
| MAC_07994     | alpha-1,2 mannosyltransferase KTR1                  | -1.66                    |
| MAC_00623     | beta-glucosidase                                    | 2.71                     |
| MAC_08465     | Cel3b putative secreted beta-glucosidase            | -1.13                    |
| MAC_06612     | Cel5b putative endoglucanase                        | 1.75                     |
| MAC_08916     | cell surface protein                                | 2.14                     |
| MAC_00160     | cell wall glycosyl hydrolase YteR, putative         | 2.16                     |
| MAC_04381     | chitinase                                           | -1.01                    |
| MAC_08492     | chitinase                                           | -1.09                    |
| MAC_07327     | chitinase                                           | -1.25                    |
| MAC_04884     | chitinase 18-18                                     | 1.12                     |
| MAC_00345     | chitinase 18-3                                      | -1.88                    |
| MAC_04294     | chitosanase                                         | 2.77                     |
| MAC_05829     | choline dehydrogenase, putative                     | 1.80                     |
| MAC_07331     | cholinesterase                                      | -1.84                    |
| MAC_02142     | endo alpha-1,4 polygalactosaminidase precursor      | 1.40                     |
| MAC_02571     | endoglucanase, putative                             | -1.34                    |
| MAC_00550     | exo-beta-1,3-glucanase                              | 1.52                     |

| Gene Symbol              | Description                                           | log <sub>2</sub> (OE/WT) |
|--------------------------|-------------------------------------------------------|--------------------------|
| MAC_01988                | exo-polygalacturonase, putative                       | -1.06                    |
| MAC_06333                | FAD binding domain protein                            | 1.38                     |
| MAC_09703                | FAD binding domain-containing protein                 | 3.07                     |
| MAC_02934                | glucose-methanol-choline oxidoreductase               | 2.22                     |
| MAC_01372                | Glycosyl hydrolase family 16 protein                  | -1.06                    |
| MAC_02139                | glycosyl transferase, putative                        | 2.59                     |
| MAC_06157                | glycosyl transferase, putative                        | -1.13                    |
| MAC_02882                | glycosyltransferase                                   | 3.92                     |
| MAC_06700                | GMC oxidoreductase                                    | 3.23                     |
| MAC_05784                | lipase/esterase family protein, putative              | 3.92                     |
| MAC_02090                | meiotically up-regulated protein                      | 1.74                     |
| MAC_02485                | N,O-diacetyl muramidase, putative                     | 5.17                     |
| MAC_06282                | N-acetylglucosaminidase                               | 1.43                     |
| MAC_01567                | NAD binding Rossmann fold oxidoreductase, putative    | -1.35                    |
| MAC_02088                | Phospholipase/Carboxylesterase family protein         | 1.66                     |
| MAC_07255                | polysaccharide synthase Cps1, putative                | 2.00                     |
| MAC_04394                | putative beta 1,3-galactosyltransferase polypeptide 1 | 1.06                     |
| MAC_06016                | putative beta-glucosidase 1 precursor                 | 2.58                     |
| MAC_08411                | putative endochitinase CHI2                           | -1.86                    |
| MAC_06143                | putative glyoxal oxidase precursor                    | 2.08                     |
| <b>Carbon metabolism</b> |                                                       |                          |
| MAC_01403                | hexose transport-related protein                      | -2.16                    |
| MAC_01989                | glucose transporter                                   | 1.40                     |



| Gene Symbol                | Description                                   | log <sub>2</sub> (OE/WT) |
|----------------------------|-----------------------------------------------|--------------------------|
| MAC_01225                  | glucose transporter-like protein              | -1.11                    |
| MAC_02951                  | sugar transporter                             | 1.97                     |
| MAC_04267                  | sugar transporter family protein              | 1.07                     |
| MAC_03497                  | glucosamine-6-phosphate deaminase             | -1.20                    |
| MAC_04299                  | UDP-glucose 6-dehydrogenase                   | -1.27                    |
| <b>Nitrogen metabolism</b> |                                               |                          |
| MAC_04872                  | urea active transporter                       | -1.25                    |
| MAC_09277                  | glutamyl-tRNA(Gln) amidotransferase           | 1.27                     |
| MAC_08898                  | glutamate decarboxylase, putative             | 3.65                     |
| MAC_09524                  | glutathione S-transferase                     | -1.23                    |
| MAC_05310                  | glutathione-dependent formaldehyde-activating | 1.11                     |
| MAC_06320                  | aspartic proteinase                           | 1.34                     |
| MAC_00229                  | amino acid permease, putative                 | 3.14                     |
| MAC_09782                  | amino acid transporter arg-13                 | 1.42                     |
| MAC_03365                  | amino acid transporter, putative              | 1.24                     |
| MAC_00316                  | Amino-acid permease inda l                    | 4.02                     |
| MAC_04079                  | Amino-acid permease inda l                    | -1.55                    |
| MAC_08200                  | tryptophanyl-tRNA synthetase                  | 5.86                     |
| <b>Lipid metabolism</b>    |                                               |                          |
| MAC_02669                  | fatty acid desaturase                         | -1.24                    |
| MAC_06765                  | fatty acid synthase beta subunit dehydratase  | -1.01                    |
| MAC_05732                  | cytochrome P450                               | 1.36                     |
| MAC_00512                  | cytochrome P450 C1CP1                         | 1.71                     |

| <b>Gene Symbol</b>                                | <b>Description</b>                                                    | <b>log<sub>2</sub>(OE/WT)</b> |
|---------------------------------------------------|-----------------------------------------------------------------------|-------------------------------|
| MAC_04407                                         | Cytochrome P450 family protein                                        | 5.79                          |
| MAC_06623                                         | cytochrome P450 phenylacetate 2-hydroxylase, putative                 | 5.41                          |
| MAC_01110                                         | cytochrome P450, putative                                             | -1.29                         |
| <b>Signal transduction and gene transcription</b> |                                                                       |                               |
| MAC_08931                                         | transcription factor atf21                                            | 1.61                          |
| MAC_06768                                         | transcriptional activator xlnR                                        | -1.95                         |
| MAC_03710                                         | transcriptional regulator, putative                                   | 1.36                          |
| MAC_04517                                         | bZIP transcription factor                                             | 1.07                          |
| MAC_02987                                         | bZIP transcription factor, putative                                   | 1.06                          |
| MAC_00734                                         | C2H2 transcription factor                                             | -1.01                         |
| MAC_04110                                         | C6 transcription factor, putative                                     | 3.63                          |
| MAC_08121                                         | C6 transcription factor, putative                                     | 1.00                          |
| MAC_02136                                         | C6 zinc finger domain protein                                         | 4.02                          |
| MAC_00655                                         | C6 zinc finger domain-containing protein                              | -3.24                         |
| MAC_04218                                         | DNA repair protein RAD51                                              | -1.11                         |
| MAC_03048                                         | Fungal Zn binuclear cluster domain containing protein                 | 3.36                          |
| MAC_00224                                         | GAL4 & Fungal specific transcription factor domain containing protein | -1.28                         |
| MAC_03969                                         | G-protein coupled receptor                                            | -1.06                         |
| MAC_01182                                         | MedA                                                                  | 2.07                          |
| MAC_04665                                         | putative ZIP zinc transporter                                         | 1.05                          |
| MAC_09046                                         | trypsin-related protease                                              | -1.69                         |
| MAC_06833                                         | trypsin-related protease                                              | -1.80                         |
| <b>Pathogenicity related</b>                      |                                                                       |                               |

| Gene Symbol | Description                                                       | log <sub>2</sub> (OE/WT) |
|-------------|-------------------------------------------------------------------|--------------------------|
| MAC_07558   | major allergen Asp f 2-like protein                               | 1.41                     |
| MAC_01990   | short chain dehydrogenase                                         | -1.23                    |
| MAC_08496   | methyl transferase-like protein                                   | 1.26                     |
| MAC_07470   | subtilisin-like serine protease PR1C                              | 4.07                     |
| MAC_08198   | pyoverdine/dityrosine biosynthesis protein, putative              | 6.19                     |
| MAC_05902   | carboxyphosphoenolpyruvate phosphonmutase, putative               | 7.68                     |
| MAC_02342   | steroid monooxygenase, putative                                   | 1.04                     |
| MAC_08215   | O-methyltransferase, putative                                     | 3.44                     |
| MAC_00588   | 2-epi-5-epi-valiolone synthase                                    | 4.09                     |
| MAC_05087   | sexual differentiation process protein isp4, putative             | 1.96                     |
| MAC_02895   | uracil permease                                                   | -1.68                    |
| MAC_04256   | efflux pump antibiotic resistance protein, putative               | -1.01                    |
| MAC_08199   | aldehyde dehydrogenase                                            | 5.96                     |
| MAC_04550   | Major Facilitator Superfamily protein                             | 2.77                     |
| MAC_08197   | MFS monocarboxylate transporter, putative                         | 5.89                     |
| MAC_02196   | NmrA family transcriptional regulator                             | -1.63                    |
| MAC_08514   | flotillin domain containing protein                               | 1.08                     |
| MAC_02260   | GTPase activating protein (Gyp3), putative                        | -1.00                    |
| MAC_06567   | allantoate permease, putative                                     | 4.51                     |
| MAC_09273   | putative allantoate permease of the major facilitator superfamily | 1.80                     |
| MAC_05384   | laccase                                                           | -2.20                    |
| MAC_04408   | ABC transporter                                                   | 3.09                     |
| MAC_02894   | extracellular phospholipase C                                     | 3.82                     |

| Gene Symbol                | Description                                                 | log <sub>2</sub> (OE/WT) |
|----------------------------|-------------------------------------------------------------|--------------------------|
| MAC_00210                  | flavin containing polyamine oxidase, putative               | 2.02                     |
| MAC_04467                  | laccase Lcc5                                                | 2.69                     |
| MAC_05171                  | phosphate permease                                          | -1.28                    |
| MAC_02353                  | sodium/phosphate symporter, putative                        | 1.41                     |
| MAC_00955                  | 3-isopropylmalate dehydrogenase                             | -2.62                    |
| MAC_05040                  | candidapepsin-4 precursor                                   | -1.27                    |
| MAC_05605                  | perilipin-like protein                                      | 1.75                     |
| MAC_07597                  | beta-lactamase, putative                                    | -1.33                    |
| MAC_05385                  | conidial pigment polyketide synthase PksP/Alb1              | -2.28                    |
| MAC_04410                  | lysine amidinotransferase                                   | 4.15                     |
| MAC_09160                  | MFS phospholipid transporter Git1                           | 1.30                     |
| MAC_09677                  | ferrichrome-type siderophore transporter                    | 1.50                     |
| MAC_08294                  | siderophore iron transporter                                | 1.23                     |
| MAC_04556                  | siderophore iron transporter, putative                      | 6.35                     |
| MAC_00287                  | penicillin-binding protein, putative                        | -2.18                    |
| MAC_06859                  | MFS multidrug transporter, putative                         | -1.95                    |
| MAC_02091                  | acyltransferase, putative                                   | 1.44                     |
| MAC_04118                  | alanine racemase                                            | 2.06                     |
| MAC_08656                  | putative glyoxal oxidase precursor                          | 5.38                     |
| MAC_00987                  | adhesin protein Mad1                                        | 3.37                     |
| MAC_05411                  | subtilisin-like protease                                    | -1.12                    |
| <b>Cell wall integrity</b> |                                                             |                          |
| MAC_04903                  | cell wall galactomannoprotein Mp2/allergen F17-like protein | 2.84                     |

| Gene Symbol                               | Description                          | log <sub>2</sub> (OE/WT) |
|-------------------------------------------|--------------------------------------|--------------------------|
| MAC_06850                                 | cell wall protein                    | 1.64                     |
| MAC_07330                                 | Hydrophobin-like protein ssgA        | 2.63                     |
| <b>Stress response and detoxification</b> |                                      |                          |
| MAC_05034                                 | heat shock protein 101               | -2.13                    |
| MAC_04217                                 | heat shock protein 30                | -1.93                    |
| MAC_06364                                 | heat shock protein 30                | -2.15                    |
| MAC_07086                                 | heat shock protein 78 precursor      | -1.71                    |
| MAC_00155                                 | Hsp70 family chaperone, putative     | 5.65                     |
| <b>Membrane protein</b>                   |                                      |                          |
| MAC_00494                                 | integral membrane family protein     | 2.05                     |
| MAC_00161                                 | integral membrane protein            | 5.63                     |
| MAC_07739                                 | integral membrane protein            | 2.29                     |
| MAC_04572                                 | integral membrane protein            | 2.23                     |
| MAC_03905                                 | integral membrane protein            | 1.35                     |
| MAC_04723                                 | integral membrane protein            | 1.30                     |
| MAC_03331                                 | integral membrane protein            | -1.01                    |
| MAC_06568                                 | integral membrane protein, putative  | 5.84                     |
| MAC_05731                                 | integral membrane protein, putative  | 2.98                     |
| MAC_09015                                 | integral membrane protein, putative  | 1.72                     |
| MAC_09359                                 | integral membrane protein, putative  | -1.35                    |
| MAC_08930                                 | aquaporin                            | -1.56                    |
| MAC_02576                                 | transmembrane glycoprotein, putative | -1.03                    |
| MAC_05991                                 | Plasma membrane proteolipid 3        | 1.01                     |

| Gene Symbol                      | Description                                                          | log <sub>2</sub> (OE/WT) |
|----------------------------------|----------------------------------------------------------------------|--------------------------|
| MAC_08765                        | pheromone-regulated multispanning membrane protein<br>Prm1, putative | -1.10                    |
| <b>Cellular transport</b>        |                                                                      |                          |
| MAC_04282                        | transporter-like protein                                             | 2.37                     |
| MAC_05849                        | cation transport ATPase                                              | -1.76                    |
| MAC_09357                        | chloride channel protein, putative                                   | -1.15                    |
| MAC_06066                        | siderophore iron transporter mirB                                    | 1.05                     |
| MAC_07963                        | vacuolar calcium ion transporter, putative                           | 1.10                     |
| MAC_08868                        | MFS transporter                                                      | 2.87                     |
| MAC_06625                        | MFS transporter (Mch2), putative                                     | 4.39                     |
| MAC_04724                        | MFS transporter, putative                                            | 1.79                     |
| MAC_06963                        | MFS transporter, putative                                            | 1.12                     |
| MAC_09623                        | ABC transporter, putative                                            | 2.25                     |
| MAC_07962                        | calcium ion transporter Vcx1, putative                               | 2.08                     |
| MAC_00876                        | oligopeptide transporter OPT-like protein                            | 1.07                     |
| MAC_08276                        | outer membrane autotransporter                                       | 1.70                     |
| MAC_05825                        | vitamin B6 transporter, putative                                     | 2.92                     |
| MAC_01249                        | sulfate permease II                                                  | 1.84                     |
| <b>Other cellular metabolism</b> |                                                                      |                          |
| MAC_02365                        | PAF acetylhydrolase family protein                                   | -1.41                    |
| MAC_00986                        | phenylacetyl-CoA ligase                                              | 1.27                     |
| MAC_06592                        | proline oxidase PrnD                                                 | -1.40                    |
| MAC_07223                        | Pumilio-family RNA binding repeat protein                            | -1.08                    |
| MAC_07741                        | putative cytochrome P450 3A7                                         | -1.63                    |

| Gene Symbol | Description                                              | log <sub>2</sub> (OE/WT) |
|-------------|----------------------------------------------------------|--------------------------|
| MAC_01101   | putative polyketide synthase protein                     | -1.02                    |
| MAC_01768   | riboflavine-aldehyde-forming enzyme                      | -1.39                    |
| MAC_08291   | serine peptidase, putative                               | -1.38                    |
| MAC_03313   | transposase-like protein                                 | -1.38                    |
| MAC_06613   | xenobiotic compound monooxygenase, DszA family, putative | 1.31                     |
| MAC_04576   | HMG box protein, putative                                | -1.15                    |
| MAC_09200   | GNAT family acetyltransferase, putative                  | -1.19                    |
| MAC_04028   | gibberellin 20-oxidase, putative                         | -1.90                    |
| MAC_09358   | extracellular dioxygenase, putative                      | -3.73                    |
| MAC_09232   | extracellular lipase                                     | -1.67                    |
| MAC_03642   | extracellular serine-rich protein                        | -1.04                    |
| MAC_02143   | extracellular serine-rich protein, putative              | 2.32                     |
| MAC_04228   | DRAP deaminase                                           | -1.68                    |
| MAC_01700   | dual specificity phosphatase, putative                   | 1.01                     |
| MAC_02279   | dipeptidyl peptidase III                                 | -1.10                    |
| MAC_01196   | cysteine synthase B, putative                            | -1.08                    |
| MAC_02449   | amidase                                                  | -1.47                    |
| MAC_01012   | 6-phosphogluconate dehydrogenase, NAD-binding protein    | -1.24                    |
| MAC_07097   | kinesin                                                  | 1.19                     |
| MAC_02819   | 2,3-dihydroxybenzoic acid decarboxylase dhbD             | 1.09                     |
| MAC_06281   | 2-nitropropane dioxygenase                               | 1.26                     |
| MAC_04117   | 2OG-Fe(II) oxygenase family oxidoreductase, putative     | 1.54                     |
| MAC_09383   | 2OG-Fe(II) oxygenase family oxidoreductase, putative     | 1.48                     |

| Gene Symbol | Description                                                            | log <sub>2</sub> (OE/WT) |
|-------------|------------------------------------------------------------------------|--------------------------|
| MAC_03200   | 3-beta hydroxysteroid dehydrogenase/isomerase family protein, putative | -1.17                    |
| MAC_08104   | 3-octaprenyl-4-hydroxybenzoate carboxy-lyase, putative                 | -1.92                    |
| MAC_01745   | 3'-tRNA processing endoribonuclease                                    | -1.41                    |
| MAC_05007   | 4-aminobutyrate aminotransferase                                       | -1.32                    |
| MAC_01226   | ABC drug exporter AtrF                                                 | 1.33                     |
| MAC_06829   | acetamidase                                                            | -1.94                    |
| MAC_08695   | acetolactate synthase                                                  | 1.18                     |
| MAC_01859   | acetylase, putative                                                    | -2.22                    |
| MAC_02483   | acid phosphatase precursor                                             | 1.89                     |
| MAC_08531   | amidohydrolase 2                                                       | 3.21                     |
| MAC_03832   | amidohydrolase family protein                                          | 1.17                     |
| MAC_06735   | arrestin                                                               | 1.05                     |
| MAC_03628   | ATP-citrate synthase subunit 1                                         | -1.24                    |
| MAC_02852   | beta-lactamase                                                         | 1.31                     |
| MAC_01323   | branched-chain amino acid aminotransferase, putative                   | -1.30                    |
| MAC_05025   | calcineurin-like phosphoesterase, putative                             | 2.00                     |
| MAC_09459   | CAMK family protein kinase                                             | 1.63                     |
| MAC_03712   | catalase                                                               | 1.18                     |
| MAC_04554   | citrinin biosynthesis transcriptional activator CtnR                   | 6.39                     |
| MAC_04340   | collagen-like protein Mcl1                                             | 1.04                     |
| MAC_05828   | Cupin family protein                                                   | 2.76                     |
| MAC_05826   | Cupin family protein                                                   | 2.00                     |
| MAC_05903   | cysteine desulfurase                                                   | 3.86                     |



| Gene Symbol | Description                                  | log <sub>2</sub> (OE/WT) |
|-------------|----------------------------------------------|--------------------------|
| MAC_07038   | dicarboxylic amino acid permease             | 1.29                     |
| MAC_07011   | dienelactone hydrolase family protein        | 2.80                     |
| MAC_01548   | DOC family protein                           | 2.02                     |
| MAC_05901   | DUF1275 domain protein                       | 3.87                     |
| MAC_06624   | DUF636 domain protein                        | 4.08                     |
| MAC_00837   | DUF718 domain protein                        | 1.24                     |
| MAC_00176   | DUF895 domain membrane protein               | 1.03                     |
| MAC_07838   | enoyl-CoA hydratase/isomerase family protein | 1.03                     |
| MAC_08796   | exo-1,3-beta-D-glucanase                     | 1.73                     |
| MAC_05743   | farnesyl pyrophosphate synthetase 1          | 2.41                     |
| MAC_08103   | flavoprotein family                          | -1.35                    |
| MAC_08932   | formate dehydrogenase                        | 2.27                     |
| MAC_08871   | general amino acid permease AGP3             | -1.01                    |
| MAC_02718   | GNAT family acetyltransferase                | -1.15                    |
| MAC_03099   | GNS1/SUR4 family protein                     | -1.01                    |
| MAC_04771   | GPI anchored protein, putative               | 1.06                     |
| MAC_01777   | Guanylyl-specific ribonuclease F1            | -1.35                    |
| MAC_01563   | H /K ATPase alpha subunit, putative          | 2.56                     |
| MAC_09212   | heme-binding peroxidase                      | 1.30                     |
| MAC_02133   | homogentisate 1,2-dioxygenase                | -2.78                    |
| MAC_03949   | HPP family protein                           | 1.54                     |
| MAC_09686   | hscarg dehydrogenase, putative               | 2.66                     |
| MAC_09348   | hydroxyisocaproate dehydrogenase             | -1.21                    |

| Gene Symbol | Description                                               | log <sub>2</sub> (OE/WT) |
|-------------|-----------------------------------------------------------|--------------------------|
| MAC_07816   | Inorganic pyrophosphatase                                 | 1.63                     |
| MAC_05586   | isochorismatase family hydrolase, putative                | -1.22                    |
| MAC_03907   | isoflavone reductase family protein                       | 2.53                     |
| MAC_09103   | lactam utilization protein LamB                           | 2.08                     |
| MAC_02947   | lactonohydrolase                                          | 1.14                     |
| MAC_09146   | late sexual development protein                           | -2.63                    |
| MAC_00249   | LEA domain protein                                        | 1.10                     |
| MAC_04553   | leucoanthocyanidin dioxygenase, putative                  | 8.86                     |
| MAC_06024   | lipase                                                    | 1.11                     |
| MAC_04378   | magnesium-translocating P-type ATPase family protein      | 1.70                     |
| MAC_08022   | malate dehydrogenase                                      | 1.33                     |
| MAC_00187   | Maleylacetate reductase, putative                         | 5.23                     |
| MAC_01408   | mannosylphosphate transferase                             | -2.16                    |
| MAC_04112   | metallo-beta-lactamase domain protein                     | 2.23                     |
| MAC_07747   | methylase involved in ubiquinone/menaquinone biosynthesis | -1.82                    |
| MAC_01539   | monooxygenase, putative                                   | 3.54                     |
| MAC_04141   | NAD dependent epimerase/dehydratase family protein        | 1.51                     |
| MAC_00077   | NAD dependent epimerase/dehydratase, putative             | 1.20                     |
| MAC_05552   | NADH oxidase                                              | 1.16                     |
| MAC_03488   | neutral ceramidase precursor                              | 1.23                     |
| MAC_06296   | NlpC/P60-like cell-wall peptidase                         | 3.81                     |
| MAC_01451   | NlpC/P60-like cell-wall peptidase                         | 3.34                     |
| MAC_09811   | O-methyltransferase, putative                             | 2.25                     |

| Gene Symbol | Description                                                      | log <sub>2</sub> (OE/WT) |
|-------------|------------------------------------------------------------------|--------------------------|
| MAC_06944   | P450 monooxygenase                                               | 3.53                     |
| MAC_09557   | pathway-specific nitrogen regulator                              | 1.61                     |
| MAC_01190   | penicillopepsin                                                  | -1.20                    |
| MAC_02150   | peptidase family T4 protein                                      | 2.06                     |
| MAC_02278   | pfs domain-containing protein                                    | -1.40                    |
| MAC_00781   | phosphatidyl synthase                                            | -1.29                    |
| MAC_04466   | phosphoglycerate mutase family protein, putative                 | 4.06                     |
| MAC_05098   | phosphotransferase enzyme family protein                         | 1.03                     |
| MAC_09553   | phytanoyl-CoA dioxygenase                                        | 3.69                     |
| MAC_03162   | phytanoyl-CoA dioxygenase                                        | 1.18                     |
| MAC_09175   | protein CCC1, putative                                           | 1.58                     |
| MAC_02249   | protein kinase-like protein                                      | 1.36                     |
| MAC_07571   | Putative cryptochrome DASH                                       | 1.07                     |
| MAC_06615   | putative cyclic nucleotide gated channel beta 1                  | 1.00                     |
| MAC_02896   | putative DCG1 protein                                            | -2.22                    |
| MAC_03964   | putative D-hydroxyacid dehydrogenase                             | 1.52                     |
| MAC_08692   | putative glyoxalase family protein                               | 1.20                     |
| MAC_03198   | putative histidine acid phosphatase                              | 2.37                     |
| MAC_04557   | putative nucleoside-diphosphate-sugar epimerase                  | 10.05                    |
| MAC_08317   | putative sialidase                                               | -1.04                    |
| MAC_00602   | putative tetracycline efflux protein (otrB)                      | 1.04                     |
| MAC_01858   | pyridine nucleotide-disulfide oxidoreductase AMID-like, putative | 1.15                     |
| MAC_05442   | pyruvate dehydrogenase, putative                                 | 1.56                     |

| Gene Symbol    | Description                                | log <sub>2</sub> (OE/WT) |
|----------------|--------------------------------------------|--------------------------|
| MAC_06618      | retinol dehydrogenase 8                    | -1.15                    |
| MAC_03447      | sarcosine oxidase                          | -1.34                    |
| MAC_04455      | ser/Thr protein phosphatase superfamily    | 1.05                     |
| MAC_02763      | serine-type carboxypeptidase               | 5.79                     |
| MAC_04682      | serine-type carboxypeptidase               | 2.07                     |
| MAC_06414      | SH3 domain containing protein              | 1.02                     |
| MAC_01414      | short chain dehydrogenase                  | -1.19                    |
| MAC_07623      | sulfatase                                  | -1.52                    |
| MAC_06569      | thiamine pyrophosphate enzyme              | 1.19                     |
| MAC_09676      | ThiJ/PfpI family protein                   | 1.04                     |
| MAC_02186      | thiol methyltransferase, putative          | 4.33                     |
| MAC_01562      | transposase                                | 1.78                     |
| MAC_08412      | TRI14-like protein                         | -1.07                    |
| MAC_04360      | trypsin, putative                          | -1.22                    |
| MAC_05716      | tyrosinase, putative                       | 1.97                     |
| MAC_05709      | uracil permease, putative                  | 3.84                     |
| MAC_04549      | YCII-related domain protein                | 2.61                     |
| MAC_08195      | zinc-binding oxidoreductase ToxD, putative | 4.05                     |
| <b>Unknown</b> |                                            |                          |
| MAC_02137      | hypothetical protein                       | 6.53                     |
| MAC_08201      | hypothetical protein                       | 6.02                     |
| MAC_08196      | hypothetical protein                       | 5.83                     |
| MAC_04973      | hypothetical protein                       | 5.31                     |

| Gene Symbol | Description          | log <sub>2</sub> (OE/WT) |
|-------------|----------------------|--------------------------|
| MAC_05095   | hypothetical protein | 4.95                     |
| MAC_06626   | hypothetical protein | 4.83                     |
| MAC_02957   | hypothetical protein | 4.56                     |
| MAC_05441   | hypothetical protein | 4.28                     |
| MAC_05835   | hypothetical protein | 3.99                     |
| MAC_01123   | hypothetical protein | 3.50                     |
| MAC_02670   | hypothetical protein | 3.39                     |
| MAC_04111   | hypothetical protein | 3.35                     |
| MAC_08447   | hypothetical protein | 3.18                     |
| MAC_02602   | hypothetical protein | 3.17                     |
| MAC_04417   | hypothetical protein | 3.15                     |
| MAC_05908   | hypothetical protein | 3.07                     |
| MAC_00584   | hypothetical protein | 2.93                     |
| MAC_00611   | hypothetical protein | 2.93                     |
| MAC_07302   | hypothetical protein | 2.78                     |
| MAC_08505   | hypothetical protein | 2.74                     |
| MAC_07882   | hypothetical protein | 2.50                     |
| MAC_02330   | hypothetical protein | 2.40                     |
| MAC_01540   | hypothetical protein | 2.35                     |
| MAC_09732   | hypothetical protein | 2.30                     |
| MAC_07186   | hypothetical protein | 2.27                     |
| MAC_03362   | hypothetical protein | 2.19                     |
| MAC_04283   | hypothetical protein | 2.17                     |

| Gene Symbol | Description          | log <sub>2</sub> (OE/WT) |
|-------------|----------------------|--------------------------|
| MAC_05630   | hypothetical protein | 2.16                     |
| MAC_07526   | hypothetical protein | 2.14                     |
| MAC_04005   | hypothetical protein | 2.06                     |
| MAC_01934   | hypothetical protein | 2.05                     |
| MAC_02089   | hypothetical protein | 2.02                     |
| MAC_05629   | hypothetical protein | 1.98                     |
| MAC_09274   | hypothetical protein | 1.97                     |
| MAC_08795   | hypothetical protein | 1.91                     |
| MAC_01150   | hypothetical protein | 1.90                     |
| MAC_02486   | hypothetical protein | 1.88                     |
| MAC_04496   | hypothetical protein | 1.88                     |
| MAC_05640   | hypothetical protein | 1.86                     |
| MAC_02105   | hypothetical protein | 1.84                     |
| MAC_06604   | hypothetical protein | 1.81                     |
| MAC_07559   | hypothetical protein | 1.80                     |
| MAC_04833   | hypothetical protein | 1.79                     |
| MAC_07182   | hypothetical protein | 1.76                     |
| MAC_02992   | hypothetical protein | 1.75                     |
| MAC_09694   | hypothetical protein | 1.75                     |
| MAC_08708   | hypothetical protein | 1.73                     |
| MAC_07839   | hypothetical protein | 1.72                     |
| MAC_06367   | hypothetical protein | 1.69                     |
| MAC_04420   | hypothetical protein | 1.69                     |

| <b>Gene Symbol</b> | <b>Description</b>   | <b>log<sub>2</sub>(OE/WT)</b> |
|--------------------|----------------------|-------------------------------|
| MAC_09057          | hypothetical protein | 1.61                          |
| MAC_04137          | hypothetical protein | 1.57                          |
| MAC_04003          | hypothetical protein | 1.55                          |
| MAC_07844          | hypothetical protein | 1.54                          |
| MAC_09642          | hypothetical protein | 1.54                          |
| MAC_09630          | hypothetical protein | 1.53                          |
| MAC_03252          | hypothetical protein | 1.52                          |
| MAC_03311          | hypothetical protein | 1.51                          |
| MAC_02059          | hypothetical protein | 1.49                          |
| MAC_01375          | hypothetical protein | 1.48                          |
| MAC_04761          | hypothetical protein | 1.48                          |
| MAC_04763          | hypothetical protein | 1.47                          |
| MAC_07671          | hypothetical protein | 1.45                          |
| MAC_06083          | hypothetical protein | 1.44                          |
| MAC_02242          | hypothetical protein | 1.43                          |
| MAC_00585          | hypothetical protein | 1.41                          |
| MAC_09283          | hypothetical protein | 1.41                          |
| MAC_06328          | hypothetical protein | 1.39                          |
| MAC_01713          | hypothetical protein | 1.38                          |
| MAC_04929          | hypothetical protein | 1.37                          |
| MAC_03312          | hypothetical protein | 1.36                          |
| MAC_00246          | hypothetical protein | 1.34                          |
| MAC_07842          | hypothetical protein | 1.33                          |

| Gene Symbol | Description          | log <sub>2</sub> (OE/WT) |
|-------------|----------------------|--------------------------|
| MAC_07383   | hypothetical protein | 1.33                     |
| MAC_02073   | hypothetical protein | 1.32                     |
| MAC_05606   | hypothetical protein | 1.31                     |
| MAC_01086   | hypothetical protein | 1.31                     |
| MAC_03674   | hypothetical protein | 1.31                     |
| MAC_03004   | hypothetical protein | 1.30                     |
| MAC_06597   | hypothetical protein | 1.30                     |
| MAC_07074   | hypothetical protein | 1.30                     |
| MAC_04278   | hypothetical protein | 1.28                     |
| MAC_04190   | hypothetical protein | 1.28                     |
| MAC_09004   | hypothetical protein | 1.26                     |
| MAC_04638   | hypothetical protein | 1.25                     |
| MAC_03253   | hypothetical protein | 1.25                     |
| MAC_03190   | hypothetical protein | 1.24                     |
| MAC_03005   | hypothetical protein | 1.22                     |
| MAC_09354   | hypothetical protein | 1.19                     |
| MAC_05737   | hypothetical protein | 1.17                     |
| MAC_06932   | hypothetical protein | 1.17                     |
| MAC_05091   | hypothetical protein | 1.16                     |
| MAC_00937   | hypothetical protein | 1.14                     |
| MAC_08894   | hypothetical protein | 1.14                     |
| MAC_02306   | hypothetical protein | 1.12                     |
| MAC_06378   | hypothetical protein | 1.12                     |



| Gene Symbol | Description          | log <sub>2</sub> (OE/WT) |
|-------------|----------------------|--------------------------|
| MAC_05976   | hypothetical protein | 1.12                     |
| MAC_00214   | hypothetical protein | 1.10                     |
| MAC_00066   | hypothetical protein | 1.10                     |
| MAC_06323   | hypothetical protein | 1.10                     |
| MAC_08541   | hypothetical protein | 1.10                     |
| MAC_08279   | hypothetical protein | 1.09                     |
| MAC_05725   | hypothetical protein | 1.08                     |
| MAC_07236   | hypothetical protein | 1.08                     |
| MAC_08031   | hypothetical protein | 1.08                     |
| MAC_03366   | hypothetical protein | 1.08                     |
| MAC_09713   | hypothetical protein | 1.07                     |
| MAC_05621   | hypothetical protein | 1.05                     |
| MAC_02751   | hypothetical protein | 1.05                     |
| MAC_07012   | hypothetical protein | 1.04                     |
| MAC_02345   | hypothetical protein | 1.04                     |
| MAC_03449   | hypothetical protein | 1.04                     |
| MAC_01738   | hypothetical protein | 1.04                     |
| MAC_00834   | hypothetical protein | 1.03                     |
| MAC_07758   | hypothetical protein | 1.02                     |
| MAC_06160   | hypothetical protein | 1.01                     |
| MAC_08375   | hypothetical protein | 1.01                     |
| MAC_07515   | hypothetical protein | 1.00                     |
| MAC_08845   | hypothetical protein | 1.00                     |

| Gene Symbol | Description          | log <sub>2</sub> (OE/WT) |
|-------------|----------------------|--------------------------|
| MAC_09762   | hypothetical protein | -1.01                    |
| MAC_04883   | hypothetical protein | -1.02                    |
| MAC_02452   | hypothetical protein | -1.03                    |
| MAC_07101   | hypothetical protein | -1.04                    |
| MAC_05022   | hypothetical protein | -1.04                    |
| MAC_06391   | hypothetical protein | -1.05                    |
| MAC_06072   | hypothetical protein | -1.05                    |
| MAC_09489   | hypothetical protein | -1.07                    |
| MAC_03096   | hypothetical protein | -1.07                    |
| MAC_05320   | hypothetical protein | -1.08                    |
| MAC_02653   | hypothetical protein | -1.08                    |
| MAC_03407   | hypothetical protein | -1.08                    |
| MAC_03560   | hypothetical protein | -1.08                    |
| MAC_02857   | hypothetical protein | -1.08                    |
| MAC_05993   | hypothetical protein | -1.10                    |
| MAC_07745   | hypothetical protein | -1.11                    |
| MAC_01276   | hypothetical protein | -1.12                    |
| MAC_04127   | hypothetical protein | -1.13                    |
| MAC_06553   | hypothetical protein | -1.14                    |
| MAC_04679   | hypothetical protein | -1.14                    |
| MAC_00278   | hypothetical protein | -1.15                    |
| MAC_06239   | hypothetical protein | -1.16                    |
| MAC_05427   | hypothetical protein | -1.18                    |

| Gene Symbol | Description          | log <sub>2</sub> (OE/WT) |
|-------------|----------------------|--------------------------|
| MAC_04401   | hypothetical protein | -1.18                    |
| MAC_07098   | hypothetical protein | -1.21                    |
| MAC_01354   | hypothetical protein | -1.23                    |
| MAC_01851   | hypothetical protein | -1.23                    |
| MAC_00194   | hypothetical protein | -1.23                    |
| MAC_08464   | hypothetical protein | -1.23                    |
| MAC_02096   | hypothetical protein | -1.24                    |
| MAC_03214   | hypothetical protein | -1.25                    |
| MAC_00556   | hypothetical protein | -1.25                    |
| MAC_04620   | hypothetical protein | -1.25                    |
| MAC_01714   | hypothetical protein | -1.28                    |
| MAC_09312   | hypothetical protein | -1.28                    |
| MAC_07670   | hypothetical protein | -1.29                    |
| MAC_03039   | hypothetical protein | -1.30                    |
| MAC_02266   | hypothetical protein | -1.32                    |
| MAC_03676   | hypothetical protein | -1.32                    |
| MAC_03372   | hypothetical protein | -1.35                    |
| MAC_07619   | hypothetical protein | -1.36                    |
| MAC_02043   | hypothetical protein | -1.38                    |
| MAC_06674   | hypothetical protein | -1.40                    |
| MAC_08509   | hypothetical protein | -1.45                    |
| MAC_08954   | hypothetical protein | -1.46                    |
| MAC_05748   | hypothetical protein | -1.47                    |

| Gene Symbol | Description          | log <sub>2</sub> (OE/WT) |
|-------------|----------------------|--------------------------|
| MAC_03029   | hypothetical protein | -1.49                    |
| MAC_08315   | hypothetical protein | -1.52                    |
| MAC_07632   | hypothetical protein | -1.60                    |
| MAC_07744   | hypothetical protein | -1.63                    |
| MAC_07160   | hypothetical protein | -1.68                    |
| MAC_05927   | hypothetical protein | -1.70                    |
| MAC_07534   | hypothetical protein | -1.70                    |
| MAC_05220   | hypothetical protein | -1.71                    |
| MAC_06538   | hypothetical protein | -1.83                    |
| MAC_00672   | hypothetical protein | -2.03                    |
| MAC_05271   | hypothetical protein | -2.05                    |
| MAC_06767   | hypothetical protein | -2.46                    |
| MAC_04300   | hypothetical protein | -2.46                    |
| MAC_07886   | hypothetical protein | -2.51                    |
| MAC_07094   | hypothetical protein | -2.54                    |
| MAC_09485   | hypothetical protein | -2.58                    |

Table S5 DEGs with opposite changing trends of transcription in  $\Delta Mavib-1$  and OE

| Gene ID   | Products name                           | $\log_2(\Delta Mavib-1 / WT)$ | $\log_2(OE / WT)$ |
|-----------|-----------------------------------------|-------------------------------|-------------------|
| MAC_09703 | isoamyl alcohol oxidase, putative       | -1.94                         | 3.07              |
| MAC_07302 | hypothetical protein                    | -1.63                         | 2.78              |
| MAC_08505 | hypothetical protein                    | -1.19                         | 2.74              |
| MAC_04467 | laccase                                 | -1.58                         | 2.69              |
| MAC_02330 | hypothetical protein                    | -1.55                         | 2.40              |
| MAC_01182 | MedA                                    | -1.20                         | 2.07              |
| MAC_08795 | hypothetical protein                    | -2.30                         | 1.91              |
| MAC_06604 | hypothetical protein                    | -1.11                         | 1.81              |
| MAC_06367 | hypothetical protein                    | -1.40                         | 1.69              |
| MAC_04003 | xylitol dehydrogenase                   | -1.68                         | 1.55              |
| MAC_09677 | siderochrome-iron transporter<br>Sit1   | -1.39                         | 1.50              |
| MAC_09283 | hypothetical protein                    | -1.15                         | 1.41              |
| MAC_06320 | aspartic proteinase                     | -1.39                         | 1.34              |
| MAC_01086 | hypothetical protein                    | -1.25                         | 1.31              |
| MAC_06613 | monooxygenase, DszA family,<br>putative | -1.25                         | 1.31              |
| MAC_09277 | glutamyl-tRNA (Gln)<br>amidotransferase | -1.19                         | 1.27              |
| MAC_00986 | phenylacetyl-CoA ligase                 | -1.37                         | 1.27              |
| MAC_08514 | flotillin domain containing<br>protein  | -1.76                         | 1.08              |
| MAC_02449 | Amidase                                 | 1.07                          | -1.47             |
| MAC_04872 | urea active transporter                 | 1.12                          | -1.25             |

|           |                               |      |       |
|-----------|-------------------------------|------|-------|
| MAC_07327 | chitinase                     | 1.12 | -1.25 |
| MAC_01196 | cysteine synthase B, putative | 1.23 | -1.08 |

Table S6 CAZyme in DEGs of  $\Delta Mavib-1$

| Gene ID   | Products name                               | $\log_2(\Delta Mavib-1/WT)$ | $\log_2(OE/WT)$ | Enzyme | Family |
|-----------|---------------------------------------------|-----------------------------|-----------------|--------|--------|
| MAC_09703 | FAD binding domain-containing protein       | -1.94                       | 3.07            | AA     | AA7    |
| MAC_07994 | alpha-1,2 mannosyltransferase KTR1          | -1.57                       | -1.66           | GT     | GT15   |
| MAC_03417 | acetyl-hydrolase                            | -1.35                       | -1.05           | CE     | CE10   |
| MAC_09197 | beta-1,6-glucanase                          | -1.34                       | 0.98            | GH     | GH5    |
| MAC_06283 | acid trehalase                              | -1.19                       | -0.51           | GH     | GH65   |
| MAC_05562 | alpha-galactosidase                         | -1.14                       | -0.66           | GH     | GH36   |
| MAC_02929 | homoserine acetyltransferase family protein | -1.01                       | -0.57           | CE     | CE1    |
| MAC_07244 | putative multicopperoxidase                 | 1.08                        | -0.03           | AA     | AA1    |
| MAC_07255 | polysaccharide synthase Cps1, putative      | 1.29                        | 2.00            | GT     | GT21   |



Table S7 CAZyme in DEGs of OE

| Gene<br>Symbol | Products name                                  |                  |          | log <sub>2</sub> (Δ <i>Mavi</i><br><i>b-1</i> / WT) | log <sub>2</sub> (OE /<br>WT) | Enzyme | Family |
|----------------|------------------------------------------------|------------------|----------|-----------------------------------------------------|-------------------------------|--------|--------|
| MAC_01372      | N,O-diacetyl<br>putative                       | muramidase,      |          | -0.49                                               | 5.17                          | GH     | GH25   |
| MAC_01567      | lipase/esterase<br>putative                    | family           | protein, | -0.50                                               | 3.92                          | CE     | CE10   |
| MAC_02571      | glycosyltransferase                            |                  |          | -0.70                                               | 3.92                          | GT     | GT1    |
| MAC_04884      | GMC oxidoreductase                             |                  |          | -1.09                                               | 3.23                          | AA     | AA3    |
| MAC_00550      | FAD binding domain-containing<br>protein       |                  |          | -1.94                                               | 3.07                          | AA     | AA7    |
| MAC_03417      | chitosanase                                    |                  |          | 0.27                                                | 2.77                          | GH     | GH75   |
| MAC_01988      | beta-glucosidase                               |                  |          | 0.51                                                | 2.71                          | GH     | GH1    |
| MAC_08492      | glycosyl transferase, putative                 |                  |          | 0.15                                                | 2.59                          | GT     | GT4    |
| MAC_08411      | putative<br>precursor                          | beta-glucosidase | 1        | 0.05                                                | 2.58                          | GH     | GH3    |
| MAC_04381      | glucose-methanol-choline<br>oxidoreductase     |                  |          | -0.33                                               | 2.22                          | AA     | AA3    |
| MAC_07331      | cell wall glycosyl hydrolase YteR,<br>putative |                  |          | -0.67                                               | 2.16                          | GH     | GH105  |
| MAC_02882      | cell surface protein                           |                  |          | 0.42                                                | 2.14                          | GH     | GH135  |
| MAC_05829      | putative glyoxal oxidase precursor             |                  |          | 0.21                                                | 2.08                          | AA     | AA5    |
| MAC_08916      | polysaccharide<br>putative                     | synthase         | Cps1,    | 1.29                                                | 2.00                          | GT     | GT21   |
| MAC_06016      | choline dehydrogenase, putative                |                  |          | 0.07                                                | 1.80                          | AA     | AA3    |
| MAC_06612      | Cel5b putative endoglucanase                   |                  |          | -0.74                                               | 1.75                          | GH     | GH5    |
| MAC_07255      | meiotically up-regulated protein               |                  |          | 0.79                                                | 1.74                          | GT     | GT8    |



| Gene<br>Symbol | Products name                                               | log <sub>2</sub> ( $\Delta$ Mavi<br>b-1 / WT) | log <sub>2</sub> (OE /<br>WT) | Enzyme | Family |
|----------------|-------------------------------------------------------------|-----------------------------------------------|-------------------------------|--------|--------|
| MAC_02934      | Phospholipase/Carboxylesterase<br>family protein            | 0.01                                          | 1.66                          | CE     | CE10   |
| MAC_04294      | alcohol dehydrogenase                                       | -0.62                                         | 1.65                          | AA     | AA3    |
| MAC_07113      | alpha/beta hydrolase fold domain<br>containing protein      | 0.70                                          | 1.62                          | CE     | CE1    |
| MAC_02142      | exo-beta-1,3-glucanase                                      | 0.53                                          | 1.52                          | GH     | GH17   |
| MAC_05737      | N-acetylglucosaminidase                                     | -0.28                                         | 1.43                          | GH     | GH20   |
| MAC_00345      | endo alpha-1,4<br>polygalactosaminidase precursor           | -0.27                                         | 1.40                          | GH     | GH114  |
| MAC_07994      | FAD binding domain protein                                  | 0.48                                          | 1.38                          | AA     | AA7    |
| MAC_06700      | hypothetical protein                                        | 0.01                                          | 1.17                          | GH     | GH84   |
| MAC_09703      | chitinase 18-18                                             | 0.58                                          | 1.12                          | GH     | GH18   |
| MAC_00160      | 1,2-a-D-mannosidase                                         | 0.23                                          | 1.12                          | GH     | GH47   |
| MAC_02139      | putative beta<br>1,3-galactosyltransferase<br>polypeptide 1 | 0.29                                          | 1.06                          | GT     | GT31   |
| MAC_02485      | chitinase                                                   | -0.92                                         | -1.01                         | GH     | GH18   |
| MAC_05784      | acetyl-hydrolase                                            | -1.35                                         | -1.05                         | CE     | CE10   |
| MAC_04394      | exo-polygalacturonase, putative                             | -0.30                                         | -1.06                         | GH     | GH28   |
| MAC_02090      | Glycosyl hydrolase family 16<br>protein                     | 0.08                                          | -1.06                         | GH     | GH16   |
| MAC_06333      | chitinase                                                   | -0.18                                         | -1.09                         | CBM    | CBM1   |
| MAC_09392      | Cel3b putative secreted<br>beta-glucosidase                 | -0.76                                         | -1.13                         | GH     | GH3    |
| MAC_06143      | glycosyl transferase, putative                              | -0.70                                         | -1.13                         | GT     | GT32   |

| Gene<br>Symbol | Products name                                         | log <sub>2</sub> ( $\Delta Mavi$<br><i>b-1</i> / WT) | log <sub>2</sub> (OE /<br>WT) | Enzyme | Family |
|----------------|-------------------------------------------------------|------------------------------------------------------|-------------------------------|--------|--------|
| MAC_00623      | endoglucanase, putative                               | 0.13                                                 | -1.34                         | AA     | AA11   |
| MAC_01220      | NAD binding Rossmann fold<br>oxidoreductase, putative | -0.41                                                | -1.35                         | GH     | GH109  |
| MAC_02088      | alpha-1,2 mannosyltransferase<br>KTR1                 | -1.57                                                | -1.66                         | GT     | GT15   |
| MAC_06282      | cholinesterase                                        | -0.27                                                | -1.84                         | CE     | CE10   |
| MAC_06157      | putative endochitinase CHI2                           | -0.09                                                | -1.86                         | GH     | GH18   |
| MAC_08465      | chitinase 18-3                                        | -0.67                                                | -1.88                         | GH     | GH18   |

Table S8 DEGs related to nitrogen metabolism

| Gene Symbol | Products name                                       | $\log_2(\Delta Mavib-1/WT)$ | $\log_2(OE/WT)$ |
|-------------|-----------------------------------------------------|-----------------------------|-----------------|
| MAC_06383   | aspartate carbamoyltransferase<br>catalytic subunit | 1.11                        |                 |
| MAC_06029   | ornithine decarboxylase                             | 1.03                        |                 |
| MAC_05125   | S-adenosylmethionine decarboxylase<br>proenzyme     | 1.09                        |                 |
| MAC_04872   | urea active transporter                             | 1.12                        | -1.25           |
| MAC_05344   | urea transporter                                    | 1.01                        |                 |
| MAC_07491   | urease                                              | 1.00                        |                 |
| MAC_03493   | nitrite reductase                                   | 1.36                        |                 |
| MAC_06321   | NmrA family protein                                 | -1.90                       |                 |
| MAC_09768   | Amino-acid permease inda1                           | 1.03                        |                 |
| MAC_05400   | aspartate aminotransferase, putative                | 9.28                        |                 |
| MAC_06320   | aspartic proteinase                                 | -1.39                       | 1.34            |
| MAC_09277   | glutamyl-tRNA (Gln)<br>amidotransferase             | -1.19                       | 1.27            |
| MAC_08898   | glutamate decarboxylase, putative                   |                             | 3.65            |
| MAC_09524   | glutathione S-transferase                           |                             | -1.23           |
| MAC_05310   | glutathione-dependent<br>formaldehyde-activating    |                             | 1.11            |
| MAC_00229   | amino acid permease, putative                       |                             | 3.14            |
| MAC_09782   | amino acid transporter arg-13                       |                             | 1.42            |
| MAC_03365   | amino acid transporter, putative                    |                             | 1.24            |
| MAC_00316   | Amino-acid permease inda1                           |                             | 4.02            |
| MAC_04079   | Amino-acid permease inda1                           |                             | -1.55           |
